1 *Article*

2 **Genome-wide analyses of PAM-relaxed Cas9 genome editors reveal**  
3 **substantial off-target effects by ABE8e in rice**

4 Yuechao Wu<sup>1,3,4†</sup>, Qiurong Ren<sup>2†</sup>, Zhaohui Zhong<sup>2†</sup>, Guanqing Liu<sup>1,3,4†</sup>, Yangshuo Han<sup>1,3,4</sup>,  
5 Yu Bao<sup>1,3,4</sup>, Li Liu<sup>2</sup>, Shuyue Xiang<sup>2</sup>, Shuo Liu<sup>1,3,4</sup>, Xu Tang<sup>2</sup>, Jianping Zhou<sup>2</sup>, Xuelian  
6 Zheng<sup>2</sup>, Simon Sretenovic<sup>5</sup>, Tao Zhang<sup>1,3,4\*</sup>, Yiping Qi<sup>5,6\*</sup>, Yong Zhang<sup>1,2\*</sup>

7  
8 <sup>1</sup>Jiangsu Key Laboratory of Crop Genomics and Molecular Breeding/Jiangsu Key  
9 Laboratory of Crop Genetics and Physiology, Agricultural College of Yangzhou University,  
10 Yangzhou, China; <sup>2</sup>Department of Biotechnology, School of Life Sciences and  
11 Technology, Center for Informational Biology, University of Electronic Science and  
12 Technology of China, Chengdu 610054, China; <sup>3</sup>Key Laboratory of Plant Functional  
13 Genomics of the Ministry of Education/Joint International Research Laboratory of  
14 Agriculture and Agri-Product Safety, The Ministry of Education of China, Yangzhou  
15 University, Yangzhou, China; <sup>4</sup>Jiangsu Co-Innovation Center for Modern Production  
16 Technology of Grain Crops, Yangzhou University, Yangzhou, China; <sup>5</sup>Department of  
17 Plant Science and Landscape Architecture, University of Maryland, College Park,  
18 Maryland 20742, USA; <sup>6</sup>Institute for Bioscience and Biotechnology Research, University  
19 of Maryland, Rockville, Maryland 20850.

20  
21 † These authors contributed equally to this work.

22  
23 **\*Corresponding authors:**

24 Tao Zhang, Jiangsu Key Laboratory of Crop Genomics and Molecular Breeding, Key  
25 Laboratory of Plant Functional Genomics of the Ministry of Education, Yangzhou  
26 University, Yangzhou 225009, China; Email: [zhangtao@yzu.edu.cn](mailto:zhangtao@yzu.edu.cn)

27 Yiping Qi, Department of Plant Science and Landscape Architecture, University of  
28 Maryland, College Park, MD 20742, USA; Email: [Yiping@umd.edu](mailto:Yiping@umd.edu)

29 Yong Zhang, Department of Biotechnology, School of Life Sciences and Technology,  
30 Center for Informational Biology, University of Electronic Science and Technology of  
31 China, Room 216, Main Building, No. 4, Section 2, North Jianshe Road, Chengdu,  
32 610054, P.R. China; Email: [zhangyong916@uestc.edu.cn](mailto:zhangyong916@uestc.edu.cn)

33

34 **PAM-relaxed Cas9 nucleases, cytosine base editors and adenine base editors are**  
35 **promising tools for precise genome editing in plants. However, their genome-wide**  
36 **off-target effects are largely undetermined. Here, we conduct whole-genome**  
37 **sequencing (WGS) analyses of transgenic plants edited by xCas9, Cas9-NGv1,**  
38 **Cas9-NG, SpRY, nCas9-NG-PmCDA1, nSpRY-PmCDA1 and nSpRY-ABE8e in rice.**  
39 **Our results reveal different guide RNA (gRNA)-dependent off-target effects with**  
40 **different editors. *De novo* generated new gRNAs by SpRY editors lead to additional**  
41 **but not substantial off-target mutations. Strikingly, ABE8e results in ~500 genome-**  
42 **wide A-to-G off-target mutations at TA motif sites per transgenic plant. The**  
43 **preference of the TA motif by ABE8e is also observed at the target sites. Finally,**  
44 **we investigate the timeline and mechanism of somaclonal variation due to tissue**  
45 **culture, which chiefly contributes to the background mutations. This study**  
46 **provides a comprehensive understanding on the scales and mechanisms of off-**  
47 **target and background mutations during PAM-relaxed genome editing in plants.**

48  
49 CRISPR-Cas9 genome editing tools have greatly revolutionized plant genetics and  
50 breeding. *Streptococcus pyogenes* Cas9 (SpCas9) is the predominant Cas9 widely used,  
51 partly due to its high genome editing efficiency and simple NGG protospacer adjacent  
52 motif (PAM) requirement[1-3]. To broaden the targeting scope, many SpCas9 variants  
53 have been engineered, including xCas9 (recognizing NG, GAA and GAT PAMs)[4],  
54 SpCas9-NGv1 and SpCas9-NG (recognizing NG PAM)[5], and PAM-less SpRY[6]. These  
55 PAM-relaxed Cas9 nucleases have been widely adopted for genome editing in plants[7,  
56 8]. However, their relaxed PAM requirements could make them prone to guide RNA  
57 (gRNA)-dependent off-targeting, which awaits a comprehensive investigation in plants.

58 The development of cytosine base editors (CBEs) and adenine base editors (ABEs)  
59 further expanded the genome editing toolbox[9], enabling precise base changes in  
60 plants[10]. Cytidine deaminases and adenosine deaminases used in CBEs and ABEs  
61 could potentially catalyze deamination reactions nonspecifically in the genomes, causing  
62 gRNA-independent off-target effects. For example, whole-genome sequencing (WGS)  
63 revealed such off-target effects for rAPOBEC1-based CBEs in rice[11, 12] and mouse[13].  
64 CBEs engineered with different cytidine deaminases showed less off-target effects in

65 human cells[14, 15] and in plants[12, 16]. ABE8e, a highly processive ABE[17], catalyzes  
66 highly efficient A-to-G base transitions in human cells[18] and in plants[19-23]. Although  
67 elevated A-to-I conversions were reported in the transcriptomes of ABE8e-treated human  
68 cells[18], it is unknown whether or to what extent gRNA-independent off-target mutations  
69 in plants would be generated by ABE8e.

70 Merger of PAM-relaxed Cas9 variants and highly efficient cytidine/adenosine  
71 deaminases opens the door for highly flexible base editing in plants[10]. CBEs based on  
72 xCas9 were reported in plants to edit NGN PAM sites, albeit with very low efficiency[24-  
73 27]. SpCas9-NGv1 and SpCas9-NG based CBEs were tested in different plant  
74 species[24-26, 28, 29], generally outperforming xCas9 based CBEs at relaxed PAM  
75 sites[10]. SpRY CBEs were demonstrated to edit NRN PAMs better than NYN PAMs in  
76 rice[19-21, 30]. Similarly, ABEs were demonstrated in plants with SpCas9-NGv1[31] or  
77 SpCas9-NG [24, 26, 32] and SpRY[19-21, 30, 33]. Despite the wide demonstration of  
78 these PAM-relaxed CBEs and ABEs in plants, their potential genome-wide off-target  
79 effects have not been reported. To fill this critical knowledge gap, we comprehensively  
80 assessed gRNA-dependent and -independent off-target effects of these PAM-relaxed  
81 nucleases and base editors using WGS in rice. We also investigated the generation of  
82 somaclonal variation in the context of genome editing.

83

## 84 **Results**

85 **The experimental pipeline for studying off-target effects of PAM-relaxed genome**  
86 **editing in rice by whole-genome sequencing.** Our previous study revealed that xCas9  
87 largely retained the NGG PAM requirement of SpCas9 with improved editing  
88 specificity[25]. To simply validate this observation, we included an xCas9 construct for  
89 editing an NGG PAM site with OsDEP1-gR02-GGG. Although SpCas9-NGv1 and  
90 SpCas9-NG both recognize NGN PAMs[5, 29, 31], SpCas9-NG has higher editing  
91 efficiency than SpCas9-NGv1[5, 25]. It is intriguing to compare SpCas9-NGv1 and  
92 SpCas9-NG variants for their off-target effects and, hence, we targeted two independent  
93 sites OsDEP1-gR01-GGT and OsDEP1-gR02-CGC with both variants. Since genome-  
94 integrated T-DNAs are prone for self-editing by SpRY and its derived base editors[19],  
95 we wanted to investigate the scale of off-target mutagenesis due to such *de novo*

96 generated gRNAs by SpRY at four different target sites (OsDEP1-gR01-CGC, OsDEP1-  
97 gR04-CGC, OsPDS-gR01-TCA and OsPDS-gR03-TAA). For off-target analysis of PAM-  
98 relaxed CBEs, we focused on SpCas9-NG and SpRY with a highly efficient and specific  
99 PmCDA1 cytidine deaminase[12]. This allows us to focus our analysis on gRNA-  
100 dependent off-target effects of nSpCas9-NG-PmCDA1 and nSpRY-PmCDA1 with each  
101 editing two target sites (OsDEP1-gR01-TGT and OsDEP1-gR02-CGC for nSpCas9-NG-  
102 PmCDA1; OsALS-gR21-GCA and OsALS-gR22-AGC for nSpRY-PmCDA1). By contrast,  
103 off-target effects of the highly efficient adenosine deaminase, ABE8e, are largely  
104 unknown. Using nSpRY-ABE8e to edit two independent sites (OsPDS-gR01-TGG and  
105 OsPDS-gR04-TAA), we hoped to reveal both gRNA-dependent and -independent off-  
106 target effects by this highly efficient PAM-less ABE.

107 These constructs, along with their no corresponding gRNA controls (**Supplementary**  
108 **Table 1**), were used to generate transformed rice plants through *Agrobacterium* mediated  
109 transformation. Genome editing frequencies were calculated for most constructs  
110 including PAM-relaxed Cas9 nucleases (SpCas9-NGv1, SpCas9-NG and SpRY) (**Fig.**  
111 **1a**), and CBEs (nSpCas9-NG-PmCDA1 and nSpRY-PmCDA1) (**Fig. 1b**), and nSpRY-  
112 ABE8e (**Fig. 1c**). As expected, SpCas9-NG showed higher editing efficiency than  
113 SpCas9-NGv1 (**Fig. 1a**). Different numbers (one to four) of genome edited T<sub>0</sub> lines from  
114 different constructs and regenerated T<sub>0</sub> lines from the no corresponding gRNA constructs  
115 were chosen for WGS control samples (**Fig. 1d and Supplementary Table 1**). The  
116 resulting sequencing data showed >50X sequencing depth, >99% mapping ratio, and >97%  
117 genome coverage for all 58 samples (**Supplementary Table 2**), which were processed  
118 according to a rigid bioinformatics pipeline to call out single nucleotide variations (SNVs)  
119 and insertions or deletions (INDELS) for further comparisons and analyses (**Fig. 1e**)[12,  
120 34]. We analyzed the three T<sub>0</sub> lines edited by xCas9 at OsDEP1-gR02-GGG site and did  
121 not find gRNA- dependent off-target mutations (**Supplementary Table 3**), which is  
122 consistent with its high targeting specificity reported in human cells[4] and in rice[25].

123 **Comparison of SpCas9-NGv1, SpCas9-NG and nSpCas9-NG-PmCDA1 reveals**  
124 **differential gRNA-dependent off-target effects dictated by nuclease activity and**  
125 **editor types.** We next compared SpCas9-NGv1, SpCas9-NG and nSpCas9-NG-  
126 PmCDA1 at editing NGN PAM sites. At OsDEP1-gR02-CGC site, WGS discovered six

127 off-target sites that were edited by SpCas9-NGv1, five out of six being shared among two  
128 T<sub>0</sub> lines (**Fig. 2a**). All these six off-target sites contain NGN PAMs and no more than 1  
129 mismatch mutation in the 3-20 nt region of the protospacers, suggesting high likelihood  
130 of off-target editing. The resulting off-target mutations are small deletions and 1-bp  
131 insertions around Cas9 cleavage site, 3 bp upstream of the PAM (**Fig. 2a**), which are  
132 hallmarks of Cas9 editing outcomes. A total of 11 off-target sites with NGN PAMs were  
133 discovered among the two T<sub>0</sub> lines edited by SpCas9-NG, including the four identified  
134 with SpCas9-NGv1 (**Fig. 2b**). Only one off-target mutation was shared by the two T<sub>0</sub> lines  
135 (**Fig. 2b**). Many of the newly discovered off-target sites with SpCas9-NG contain two or  
136 more mismatches to the protospacer (**Fig. 2b**), which is consistent with increased  
137 nuclease activity of SpCas9-NG over SpCas9-NGv1[5, 25]. Six off-target sites were  
138 identified in the two T<sub>0</sub> lines edited by nSpCas9-NG-PmCDA1, with three different off-  
139 target sites in each line (**Fig. 2c**). Unlike SpCas9-NGv1 and SpCas9-NG that shared four  
140 off-target sites, the six off-target sites identified with nSpCas9-NG-PmCDA1 are all  
141 different from those identified with the nucleases (**Fig. 2d**), suggesting gRNA-dependent  
142 off-target mutations by Cas9 nucleases and base editors follow different mechanisms. Of  
143 note, four of the six off-target sites carry deletions spreading across the protospacer (**Fig.**  
144 **2c**), supporting the off-target mutations were caused by cytidine deaminase activity and  
145 base excision repair. Interestingly, none of the T<sub>0</sub> lines analyzed here showed evidence  
146 of T-DNA self-editing. This could be explained by the fact that the GTT PAM in the gRNA  
147 scaffold is not an optimal PAM for SpCas9-NGv1, SpCas9-NG and nSpCas9-NG-  
148 PmCDA1, although self-editing by SpCas9-NG was previously reported in rice[35].

149 **Comparison of SpRY and nSpRY-ABE8e reveals gRNA-dependent off-target**  
150 **mutations by *de novo* generated gRNAs.** To investigate gRNA-dependent off-target  
151 effects of SpRY editors, we first investigated the gRNA-dependent off-target effects by  
152 SpRY derived base editors. The results showed that no gRNA-dependent off-targeting  
153 was found in the edited T<sub>0</sub> lines by nSpRY-PmCDA1 (**Supplementary Table 3**). However,  
154 18 and 5 potential off-target sites with up to 5 mismatches were edited by SpRY and  
155 SpRY-ABE8e, respectively (**Supplementary Table 3**). Among these edited off-target  
156 sites, 21 out of 23 contain no more than 3 mismatch mutations in the 3-20 nt region of the

157 protospacers (**Supplementary Fig. 1a-b and Supplementary Fig. 2**). Thus, the off-  
158 target effect of SpRY could be minimized by improving the specificity of protospacers.

159 We next focused our analysis on *de novo* generated gRNAs due to T-DNA self-editing,  
160 a common phenomenon caused by the PAM-less nature of SpRY[19]. Ten lines were  
161 analyzed at four target sites (**Fig. 1a and 1b**). New gRNAs were generated at all four  
162 target sites among eight T<sub>0</sub> lines (**Fig. 3a and Supplementary Fig. 3**). Based on these  
163 new protospacers, we identified potential off-target sites with 0-5 nucleotide mismatches  
164 using Cas-OFFinder[36]. However, only two new gRNAs resulted in off-target mutations  
165 at these predicted off-target sites (**Fig. 3a**). At OsDEP1-gR01-CGC site, one new gRNA  
166 appeared to cause one SNV mutation at a target site with multiple nucleotide mismatches  
167 (**Fig. 3b**). Similarly, at OsDEP1-gR04-CGC site, one new gRNA seemed to generate  
168 either SNV or INDEL mutations at five off-target sites (**Fig. 3c**). These off-target sites  
169 showed significant difference to the protospacer of the original target gRNA (**Fig. 3c**),  
170 suggesting that the mutations at these sites were unlikely to be caused by the original  
171 gRNA, rather more likely to be created by the new gRNA. Given that detected mutations  
172 at these off-target sites are located upstream relative to the Cas9 cleavage site (**Fig. 3b**  
173 **and 3c**), it is possible that some of these mutations might not be caused by gRNA-  
174 dependent SpRY editing.

175 We also investigated self-editing related off-target effects of SpRY based CBE and  
176 ABE. For nSpRY-PmCDA1, T-DNA self-editing of the OsALS-gR21-GCA construct and  
177 the OsALS-gR22-AGC construct was detected in one out of two T<sub>0</sub> lines each  
178 (**Supplementary Fig. 4**), generating one and two new gRNAs, respectively (**Fig. 3d**). For  
179 all three new gRNAs, WGS did not detect off-target mutations at the off-target sites  
180 predicted by Cas-OFFinder (**Fig. 3d**). For nSpRY-ABE8e, T-DNA self-editing was  
181 detected in most T<sub>0</sub> lines for the OsPDS-gR01-TTG and the OsPDS-gR04-TAA  
182 constructs (**Fig. 3d and Supplementary Fig. 5**). Interestingly, in both cases, no off-target  
183 mutations were detected at Cas-OFFinder-predicted off-target sites with three or fewer  
184 nucleotide mismatches (**Fig. 3d**). However, for nSpRY-ABE\_OsPDS-gR01-TTG,  
185 mutations were detected in line 2 at two predicted off-target sites with four and five  
186 nucleotide mismatches to the protospacer of the new gRNA and with six nucleotide  
187 mismatches to the protospacer of the original target gRNA (**Fig. 3e**). Similarly, one off-

188 target mutation was detected for nSpRY-ABE\_OsPDS-gR04-TAA in line 4, where the off-  
189 target site showed two fewer mismatches (five vs. seven) to the protospacer of the new  
190 gRNA than the original target gRNA (**Fig. 3f**). All three off-target events are A-to-G  
191 conversions at target sites with NRN PAMs (**Fig. 3e and 3f**), consistent with high purity  
192 base conversion by ABE8e[18] and SpRY PAM preference of NRN PAMs over NYN  
193 PAMs[6]. Together, these data suggest that very few gRNA-dependent off-target  
194 mutations were induced by PAM-relaxed SpRY base editors.

195 **Comparison of PAM-relaxed nucleases and base editors reveals gRNA-**  
196 **independent genome-wide off-target A-to-G mutations by ABE8e.** We next pursued  
197 our analyses to reveal any off-target effects of these PAM-relaxed editors that are  
198 independent of gRNAs. For xCas9, SpCas9-NGv1, SpCas9-NG, SpRY and nSpRY-  
199 PmCDA1 constructs, both genome-edited plants and control plants shared similar  
200 numbers of SNVs (ranging from 86 to 322, on average 187), INDELS (ranging from 48 to  
201 108, on average 75) (**Fig. 4a and Supplementary Fig. 6**) and frequencies of deletions  
202 for different sizes (**Supplementary Fig. 7**). These mutations appeared to be present in  
203 all genomic regions across the genome (**Fig. 4b and Supplementary Fig. 8**). Importantly,  
204 the numbers of SNVs and INDELS observed are in the same range as those observed in  
205 other groups and our previous studies[11, 12, 16, 34], supporting these mutations were  
206 somaclonal variation due to tissue culture. Strikingly, both genome-edited plants and  
207 control plants expressing nSpRY-ABE8e showed many more SNVs, averaging 700 per  
208 plant (**Fig. 4a**) and being present in all genomic regions (**Fig. 4b**). By contrast, nSpRY-  
209 ABE8e expressing plants showed similar numbers of INDELS (on average 77) to other  
210 plant groups (**Supplementary Fig. 6**). A close analysis showed the excessive amount of  
211 SNVs in nSpRY-ABE8e expressing plants are A-to-G mutations, and the high enrichment  
212 of A-to-G mutations and decreased fractions of other nucleotide substitutions were only  
213 observed with plants expressing nSpRY-ABE8e (**Fig. 4c**). These A-to-G mutations were  
214 randomly spread across all 12 chromosomes of rice genome (**Fig. 4d**). About 95% of  
215 these A-to-G mutations belong to the category of 25%-75% allele frequencies  
216 (**Supplementary Fig. 9**), suggesting these are largely germline transmittable mutations.  
217 Our results hence demonstrated genome-wide gRNA independent A-to-G off-target  
218 mutagenesis in rice by the highly processive ABE8e.

219 **ABE8e favors TA motif sites for both off-target and on-target editing.** To further study  
220 the off-target effects by ABE8e, we analyzed all the A-to-G off-target editing sites in 10  
221 T<sub>0</sub> lines. The results showed unambiguously that ABE8e favors conversion of A to G in  
222 TA motifs on either Watson strand (**Fig. 5a**) or Crick strand (**Supplementary Fig. 10**).  
223 We reasoned that such a preference of editing TA motifs by ABE8e could also be reflected  
224 at on-target sites. To this end, we tested nCas9-ABE8e at editing an NGG PAM site in  
225 rice protoplasts and the data showed A-to-G conversions at both A<sub>4</sub> and A<sub>12</sub> (**Fig. 5b**),  
226 with both positions being at the edge of the editing window known for ABE8e[18]. The  
227 editing frequency at A<sub>12</sub> preceded by a 'T' is significantly higher than A<sub>4</sub> preceded by a  
228 'G' (**Fig. 5b**), supporting that ABE8e also favors TA motifs for on-target editing. We then  
229 analyzed all 11 edited alleles in T<sub>0</sub> lines by nSpRY-ABE8e\_OsPDS-gR01-TTG (**Fig. 5c**)  
230 and found A<sub>6</sub> preceded by a 'T' was edited at much higher frequency than A<sub>7</sub> preceded  
231 by an 'A' (**Fig. 5d**), although both A<sub>6</sub> and A<sub>7</sub> are within the ABE8e editing window.  
232 Furthermore, we analyzed the gRNA-dependent off-target editing outcomes discovered  
233 at four off-target sites by the same construct (**Fig. 5e**). A-to-G conversions were only  
234 found at TA sites, not at AA, CA, and GA sites (**Fig. 5f**). Taken together, these analyses  
235 indicate that ABE8e has a strong preference of the TA motif for both off-target and on-  
236 target editing.

237 **Investigation of the somaclonal variation production timeline in rice tissue culture.**  
238 Since most SNVs (except those from ABE8e-expressing plants) and INDELS are derived  
239 from tissue culture, it would be helpful to understand the genesis mechanism and timeline  
240 for somaclonal variation. Like many other plants, rice genome editing involves the  
241 generation of embryogenic callus, followed by *Agrobacterium* mediated transformation  
242 and regeneration[37]. We reasoned that somaclonal variation mutations would be  
243 collectively generated before (termed as 'Phase I somaclonal variation') and after  
244 *Agrobacterium* mediated transformation (termed as 'Phase II somaclonal variation') (**Fig.**  
245 **6a**). Based on the WGS data, we mapped all the T-DNA insertion sites to the rice genome  
246 among all the T<sub>0</sub> lines. Although most plants contained only one T-DNA insertion, 16 plant  
247 pairs shared the same T-DNA insertion for each pair (**Fig. 6b**), suggesting each pair of  
248 these plants were derived from the same T-DNA transformation event. We hypothesize  
249 that shared mutations among such plant pairs would largely represent Phase I



250 somaclonal variations. Our analysis largely confirmed this as the T<sub>0</sub> plants that share the  
251 same T-DNA insertion sites showed high proportion of shared mutations (**Fig. 6c and**  
252 **Supplementary Fig. 11**). Although the numbers of shared mutations for the T<sub>0</sub> lines with  
253 the same T-DNA insertions vary greatly (from 23 to 168), the average number (98) is  
254 significantly higher than the average number of shared mutations (7.4) among T<sub>0</sub> lines  
255 with diverse T-DNA insertion sites (**Fig. 6d**).

256 We next sought to understand the timeline of genome editing in the context of Phase  
257 II somaclonal variation production (**Fig. 6a**). We took advantage of the genome-wide off-  
258 target editing by ABE8e and identified three T<sub>0</sub> plant pairs that were derived from the  
259 same transgenic events, based on the shared T-DNA insertion sites (**Fig. 6b**). In all three  
260 cases, the sum of whole genome SNVs are more than 1300, with about 70% being A-to-  
261 G mutations (**Fig. 6e**), consistent with the genome wide A-to-G off-target mutations by  
262 ABE8e (**Fig. 4**). If the ABE8e-based off-target editing were to occur before the  
263 transformed callus being developed into two T<sub>0</sub> lines, the shared mutations between the  
264 two T<sub>0</sub> lines would contain a high percentage of A-to-G mutations. This is indeed the case  
265 for the two T<sub>0</sub> lines edited by nSpRY-ABE8e at OsPDS-gR01-TTG site, where over 70%  
266 shared mutations were A-to-G mutations (**Fig. 6e**). For the two remainder cases, about  
267 20% total shared mutations among the two single-event T<sub>0</sub> lines were A-to-G mutations  
268 (**Fig. 6e**), indicating most of the A-to-G off-targeted mutations in these lines were largely  
269 independently induced by the same ABE8e transgenic event. These data suggest  
270 variable timelines for genome editing to occur in the developmental stage that generates  
271 Phase II somaclonal variation. The collective analyses here elucidate the details and  
272 timelines of genome editing and somaclonal variation in rice tissue culture: About 100  
273 mutations are Phase I somaclonal variation mutations and about 253 (ranging from 62 to  
274 854) mutations are Phase II somaclonal variation mutations; Genome editing can occur  
275 at different timepoints during the Phase II tissue culture stage.

276

## 277 **Discussion**

278 PAM-relaxed Cas9 variants such as SpCas9-NG and SpRY greatly increase the targeting  
279 scope in plant genome editing[19-21, 24-26, 28-33]. However, off-target risks also  
280 increase with their relaxed PAM restriction and tendency for T-DNA self-editing[19, 35].

281 Based on WGS analyses in rice, we have found very few off-target mutations induced by  
282 SpCas9-NG, SpRY and their derived CBEs based on PmCDA1, a highly specific cytidine  
283 deaminase[12]. Our WGS analyses also revealed that SpRY and its derived base editors  
284 had higher tendency than SpCas9-NG editors to self-edit their T-DNA[19, 35]. Yet, very  
285 limited numbers of off-target mutations were detected in the edited plants by the *de novo*  
286 generated new gRNAs. Hence, our results benchmark these genome editing tools for  
287 broadened editing scope without significant off-target effects in plants.

288 The development of the highly processive ABE8e[17, 18] has greatly boosted precise  
289 adenine base editing in plants, with up to 100% editing efficiency and extremely low  
290 occurrence of INDEL byproducts, which collectively contributed to high frequency of  
291 homozygous editing in plants within a single generation[19-23]. Recently, transcriptome-  
292 wide analysis in human cells revealed off-target A-to-I conversions caused by ABE8e at  
293 the RNA level[18], a phenomenon that was previously reported for ABE7.10[38]. However,  
294 significant genome-wide off-target effects have not been previously reported for ABE8e  
295 in any organism. Remarkably, we discovered substantial genome-wide off-target effects  
296 induced by ABE8e in rice, ~500 A-to-G off-target mutations generated per plant (**Fig. 4a**  
297 **and 4d**). These off-target mutations greatly outweigh the somaclonal variation mutations,  
298 presenting a significant implication for the use of ABE8e in plant research. Unlike RNA  
299 mutations which are transient and non-inheritable, the resulting A-to-G mutations at the  
300 DNA level are largely inheritable (**Supplementary Fig. 9**). Such off-target effects of  
301 ABE8e must be addressed before its safe use in plant genetics and crop breeding.  
302 Encouragingly, engineered point mutations in the adenosine deaminase have been  
303 shown to reduce transcriptome off-target effects by ABE7.10[38], ABE8e[18] and other  
304 ABE8 variants[39]. It awaits further testing whether genome-wide off-target A-to-G  
305 conversions could be largely mitigated by adopting a highly specific ABE8e variant that  
306 carries a promising mutation such as V106W[18, 39].

307 Interestingly, we found that ABE8e favors editing of TA motifs on DNA, which is  
308 consistent with the previous observation that ABE7.10 prefers TA motifs for off-target  
309 editing on RNA[38]. Importantly, we found that such a TA motif preference by ABE8e also  
310 applies to the target sequence. Hence, this exciting discovery can be applied to improve  
311 on-target editing by ABE8e or its further engineered variants by intentionally targeting 'A'

312 in a TA motif to achieve high editing efficiency. A CBE was previously used to fine-tune  
313 gene expression in strawberry to increase the sugar content[40]. Given the high  
314 abundance of TA motifs in the cis regulatory elements (e.g., the TATA box) of many plant  
315 genes, ABE8e would be a promising tool for engineering quantitative trait variation by  
316 editing cis regulatory elements, an innovative genome editing application that has been  
317 conventionally achieved with the Cas9 nuclease(s)[7, 10, 41].

318 Our WGS analyses, along with the previous studies[11, 12, 16, 34, 42, 43], uncovered  
319 the scale of somaclonal variation derived from the tissue culture process, which by itself  
320 is a bottleneck for genome editing in plants[44]. Since somaclonal variation is present in  
321 all genome-edited plants that are generated by tissue culture, effective strategies are  
322 needed to reduce such background mutations, of which many are germline-  
323 transmittable[34]. Here, we took a unique approach to investigate the generation of  
324 somaclonal variation before and after *Agrobacterium* mediated transformation, which  
325 should be applicable to other plants. For the Phase I somaclonal variation mutations,  
326 existing before plant transformation (**Fig. 6a**), we may have limited means of reducing  
327 them. However, there are often more Phase II somaclonal variation mutations generated,  
328 which occur after *Agrobacterium* mediated transformation. We hypothesize that Phase II  
329 somaclonal variation may be reduced by accelerating plant regeneration with the  
330 expression of morphogenic or growth factors, as recently demonstrated in different plant  
331 species[45-47]. It will be promising to test this idea.

332 In summary, the comprehensive WGS analyses of PAM-relaxed Cas9 nucleases and  
333 their derived base editors revealed highly specific genome editing in rice. However,  
334 ABE8e, despite its promise for highly efficient and high-purity base editing, showed  
335 substantial genome-wide off-target A-to-G conversions that are independent of gRNAs.  
336 This study also points to promising approaches of enhancing on-target and reducing off-  
337 target A-to-G editing by ABE8e or its variants, as well as potentially reducing Phase II  
338 somaclonal variation in genome-edited plants.

339

## 340 **Methods**

341 **Plant material and growth condition.** The Nipponbare rice cultivar (*Oryza sativa* L. ssp.  
342 Japonica cv. Nipponbare) was used in this study as the WT control and transformation

343 host. All plants for the WGS assay were grown in growth chambers under a controlled  
344 environmental condition of 60% relative humidity with a 16/8 h and 32/28 °C regime for  
345 under the light/dark cycle.

346 **Construction of T-DNA vectors.** The PAM-relaxed CRISPR-Cas9 plant genome editing  
347 systems used in this study were reported in our previous studies [19, 25]. Target sites  
348 were inserted by Golden Gate reaction using BsaI HF v02 and T4 DNA Ligase (New  
349 England Biolabs) per our previous description[48-50]. Briefly, the synthesized pair oligos  
350 (10 $\mu$ M) were annealed and cool down to room temperature (23 °C). The annealed  
351 mixture was diluted to 50 nM for a total 15 cycles in the Golden Gate reaction[49, 50].  
352 The reaction mixture was transformed to *Escherichia coli* DH5 $\alpha$  competent cells followed  
353 by miniprep and Sanger sequencing.

354 **Rice transient and stable transformation.** Rice protoplast isolation, transformation and  
355 editing activity evaluation were performed as described previously[51-53]. The  
356 *Agrobacterium* mediated rice stable transformation was based on previously published  
357 protocols with minor modifications[54-56]. Briefly, the rice calli was induced and the binary  
358 T-DNA vectors were transformed into *Agrobacterium tumefaciens* EHA105 strain. The  
359 transformed EHA105 strain was cultured in the flask until the OD<sub>600</sub>=0.1 at 28 °C and  
360 collected by centrifuge. The collected *Agrobacterium* was resuspended with AAM-AS  
361 medium for calli transformation. After 3 days of co-incubation, the transformed calli were  
362 washed by sterile water and transferred to N6-S solid medium for 14 days under  
363 continuous light at 32 °C. The grown calli were collected and incubate at REIII solid  
364 medium. After a 14-day regeneration, the newly grown individual plants were transferred  
365 to HF solid medium for root induction. Then, the generated plants were moved into pods  
366 and grown in soil at growth chamber under 18 h light at 32 °C and 6 h dark at 28 °C. After  
367 4 weeks' growth, the leaf was collected both for targeted mutagenesis assay and whole  
368 genome sequencing.

369 **Mutation detection and analysis.** The genomic DNA was extracted using the CTAB  
370 method[57]. About 100 ng genomic DNA and a 50  $\mu$ L PCR reaction was used to amplify  
371 the transgene and target sequence for detection of transgenic plants and genome editing  
372 events. The oligos used in this study were shown in **Supplementary Table 4**. PCR was

373 done with 2xRapid Taq Mix (Vazyme) and examined using SSCP strategy[58]. The  
374 genotype at the target sites of each plant was confirmed by Sanger sequencing.

375 **Whole genome sequencing and data analysis.** One gram of fresh leaves was obtained  
376 from each edited rice plant for WGS. Genomic DNA was extracted using Plant Genome  
377 DNA Kit (Tiangen). All plant samples were sequenced by the Illumina NovaSeq platform  
378 (Novogene, Beijing, China). The average sequencing clean data generated for each  
379 sample was 20 Gb, with the average depth being ~50X to 70X. For data processing,  
380 adapters and low quality reads were first trimmed and filtered using SKEWER (v.  
381 0.2.2)[59]. Cleaned reads were then mapped to rice reference sequence TIGR7 (MSU7)  
382 with BWA mem (v. 0.7.17) software[60]. Picard (<https://broadinstitute.github.io/picard/>)  
383 software (v. 2.22.4) and Samtools (v. 1.9)[61] were employed to mark duplicate reads  
384 and generate sort BAM files, respectively. The Genome Analysis Toolkit (GATK v. 3.8)[62]  
385 was applied to realign the reads near INDELS and recalibrate base quality scores against  
386 known SNPs and INDELS databases (<http://snp-seek.irri.org/>). After the raw BAM files  
387 were processed by GATK, analysis-ready BAM files were generated. To identify genome-  
388 wide somatic mutations with high confidence, we applied three software each to identify  
389 SNVs and INDELS, respectively. Whole genome SNVs were detected by LoFreq (v.  
390 2.1.2)[63], MuTect2[64] and VarScan2 (v. 2.4.3)[65]. Whole genome INDELS were  
391 detected by MuTect2[64], VarScan2 (v. 2.4.3)[65] and Pindel (v. 0.2)[66]. The Bedtools  
392 (v. 2.27.1)[67] was used to obtain overlapping SNVs/INDELS among replicates or different  
393 software. SNVs and INDELS identified by all three corresponding software were retained  
394 for the further analysis. Cas-OFFinder *in silico* (v. 2.4)[36] was used to predicted putative  
395 off-target sites in the rice genome. The PAM type of SpRY, SpCas9-NG and xCas9 were  
396 set to NNN, NGN and NGN, respectively, allowing up to 5-nt mismatches in the  
397 protospacer. IGV (v. 2.8.4) software[68] was applied to visualize discovered mutations  
398 with the generated BAM and VCF files. To identify the insertion locations of T-DNA in  
399 each line, the cleaned reads were first aligned to the rice reference genome and vector  
400 sequences simultaneously. Then, the BAM files were visualized using the IGV software  
401 and 'Group Alignments by' mode was set to 'chromosome of mate' in IGV. Lastly, each  
402 T-DNA insertion site was confirmed by manual checking of paired reads aligned to both  
403 vector sequences and specific chromosomes. The genome-wide distribution of mutations

404 was drawn by Circos (v 0.69)[69]. The adjacent 3-bp sequences of the A-to-G SNVs were  
405 extracted from the reference genome sequence, and then submitted to WebLogo3  
406 (<http://weblogo.threeplusone.com/>)[70] to plot motif weblogo. Data processing, analyses,  
407 and figure plotting were completed by using R and Python.

#### 408 **Data availability**

409 The WGS data have been deposited in the Sequence Read Archive in National Center  
410 for Biotechnology Information (NCBI) under the accession number PRJNA792795 and  
411 Beijing Institute of Genomics Data Center (<http://bigd.big.ac.cn>) under BioProject  
412 PRJCA007564.

#### 413 **Acknowledgements**

414 This research was supported by the Sichuan Science and Technology Program (award  
415 no. 2021JDRC0032, 2021YFH0084 and 2021YFYZ0016) to J.Z. and Y.Z., the National  
416 Natural Science Foundation of China (award no. 32101205, 32072045 and 31960423) to  
417 X.T. and X.Z., the Open Foundation of Jiangsu Key Laboratory of Crop Genetics and  
418 Physiology (award no. YCSL202009) to J.Z, Y.Z and T.Z. It is also supported by the  
419 National Science Foundation Plant Genome Research Program (award no. IOS-2029889)  
420 and the U.S. Department of Agriculture Biotechnology Risk Assessment Grant Program  
421 competitive grant (award no. 2018-33522-28789) to Y.Q. S.S. is a Foundation for Food  
422 and Agriculture Research Fellow.

#### 423 **Author contributions**

424 Y.Z., T.Z. and Y.Q. conceived and designed the experiments. Q.R., Z.Z., X.T. and S.S.  
425 made the vectors for rice transformation. Q.R. and Z.Z. conducted rice protoplast  
426 transformation and data analysis. Q.R., Z.Z., L.L., S.X. and X.Z. did the rice stable  
427 transformation and mutagenesis assays. Q.R., Z.Z., L.L., S.X. and J.Z. prepared rice  
428 seedling samples for WGS. Y. W. and G. L. performed WGS data analysis and generated  
429 the figures. Y. H., Y. B. and S. L. assisted with data analysis. Y.Z., T.Z. and Y.Q.  
430 supervised the research and wrote the manuscript. All authors participated in discussion  
431 and revision of the manuscript.

#### 432 **Competing interests**

433 The authors declare no competing interests.

434 **Additional information**

435 Supplementary information is available for this paper.

436 **Figure legends**

437 **Figure 1. Assessment of PAM-less genome editing in rice by whole-genome**  
438 **sequencing.**

439 **a-c**, genome editing frequencies in T<sub>0</sub> lines by PAM-relaxed Cas9-NGv1, Cas9-NG and  
440 SpRY (**a**), by PAM-relaxed cytosine base editors based on nCas9-NG and nSpRY (**b**),  
441 and by PAM-less nSpRY-ABE8e adenine base editor (**c**). **d**, Summary of plants used for  
442 whole-genome sequencing. **e**, The bioinformatic pipeline for analysis of whole-genome  
443 sequencing (WGS) data. NA, editing frequency in T<sub>0</sub> lines was not scored for the  
444 constructs xCas9-OsDEP1-gR02-GGG and nSpRY-PmCDA1-OsALS-gR21-GCA.

445 **Figure 2. Different sequence preference of gRNA-dependent potential off-target**  
446 **editing by Cas9-NG nucleases and cytosine base editors.**

447 **a-c**, gRNA-dependent off-target mutations in edited T<sub>0</sub> lines at the OsDEP1-gR02-CGC  
448 site by SpCas9-NGv1 (**a**), SpCas9-NG (**b**), and nSpCas9-PmCDA1 (**c**). Off-target sites  
449 that were shared between SpCas9-NGv1 and SpCas9-NG are marked in red. Top panel,  
450 sequence comparison of target gRNA and potential off-target sites. Middle panel, the  
451 genotype of the off-target sites. Bottom panel, the number of potential off-target sites in  
452 two T<sub>0</sub> plants. **d**, Venn diagram depicting many shared off-target sites induced by the  
453 OsDEP1-gR02-CGC gRNA in SpCas9-NGv1 and SpCas9-NG, while not in nCas9-NG-  
454 PmCDA1.

455 **Figure 3. Genome-wide landscape of gRNA-dependent off-target mutations by de**  
456 **novo generated new sgRNAs by SpRY editors.**

457 **a, d**, Off-target analysis for *de novo* generated new gRNAs due to on-target editing by  
458 SpRY nuclease, nSpRY-PmCDA1 and nSpRY-ABE8e. The number of off-target sites  
459 overlapping identified mutation (SNVs+INDELS) versus the number of all potential off-  
460 target sites that predicted by Cas-OFFinder. **b-c**, gRNA-dependent off-target mutations  
461 in T<sub>0</sub> lines by *de novo* generated new gRNAs by SpRY at the OsDEP1-gR01-CGC site  
462 (**b**) and the OsDEP1-gR04-CGC-1 site (**c**). Top panel, sequence comparison of new  
463 gRNA and potential off-target sites. Middle panel, sequence comparison of target gRNA  
464 and potential off-target sites. Bottom panel, the genotype of the off-target sites. **e-f**, gRNA-



465 dependent off-target mutations by *de novo* generated new gRNAs by nSpRY-ABE8e at  
466 the OsPDS-gR01-TTG-2 site (e) and OsPDS-gR04-TAA-4 site (f).

467 **Figure 4. Genome-wide sgRNA-independent off-target effects by PAM-relaxed**  
468 **nucleases, cytosine base editors, and adenine base editors.**

469 **a**, Number of single nucleotide variation (SNV) mutations in all sequenced samples. **b**,  
470 Average number of SNV mutations in per 1 Mbp genomic region. **c**, Fractions of different  
471 nucleotide substitutions in different samples. **d**, Genome-wide distribution of A-to-G SNVs  
472 in all sequenced samples. **a-c**, Error bars represent s.e.m. and dots represent individual  
473 plants.

474 **Figure 5. ABE8e favors A-to-G conversion at TA motifs at both off-target and on-**  
475 **target sites.**

476 **a**, Preference of a TA motif by ABE8e at gRNA-independent off-target A-to-G base editing  
477 in Watson strand, 0 indicates the A-to-G SNV position. **b**, Base editing frequencies at  
478 different protospacer positions by ABE8e at a target site in rice protoplasts, *n* represents  
479 biological replicates. Data reanalyzed from ref[19]. Error bars represent s.e.m. *p*-value  
480 was calculated by the one-sided paired Student's t-Test, \*  $p < 0.05$ , \*\*  $p < 0.01$ . **c**, The  
481 genotype of mutation alleles in T<sub>0</sub> stable transformation plants. **d**, Base editing  
482 frequencies at different protospacer positions by ABE8e at a target site in rice T<sub>0</sub> lines. **e**,  
483 Presence of TA motifs at the target site appears to increase gRNA-dependent off-target  
484 A-to-G editing. **f**, The frequency of A-to-G SNV with different di-nucleic acids in T<sub>0</sub> stable  
485 transformation plants.

486 **Figure 6. Investigation of somaclonal variation production in rice tissue culture.**

487 **a**, A model that divides the generation of somaclonal variation into two phases, which  
488 points to potential of minimizing Phase II somaclonal variation with the use of morganic  
489 factors to accelerate plant regeneration. **b**, Genome-wide mapping of T-DNA integration  
490 sites for all T<sub>0</sub> lines. Constructs that contain more than one T-DNA integration site are  
491 highlighted in red. The two T<sub>0</sub> lines that carry the same T-DNA integration site were  
492 grouped by a solid line on the right, indicating they are from the same transgenic event.  
493 **c**, Four examples for the analysis of T<sub>0</sub> lines for shared mutations revealed by WGS. The

494 T<sub>0</sub> lines resulting from the same transgenic event (highlighted in red) share a significant  
495 portion of mutations (termed Phase I somaclonal variation). **d**, T<sub>0</sub> lines with the same T-  
496 DNA integration sites share an average of 98 mutations, while T<sub>0</sub> lines with different T-  
497 DNA integration sites barely share any mutations. **e**, the frequency of A-to-G SNVs in  
498 shared SNVs and whole genome SNVs from the nSpRY-ABE8e T<sub>0</sub> lines with the same  
499 transgenic events, the number above of each bar represents A-to-G SNVs versus all  
500 SNVs in a pair of T<sub>0</sub> lines. *p*-value was calculated by the Wilcoxon rank sum test, \* *p* <  
501 0.05, \*\* *p* < 0.01, NS represents not significant.

## 502 References

- 503 1. Jinek M, Chylinski K, Fonfara I, Hauer M, Doudna JA, Charpentier E: **A programmable**  
504 **dual-RNA-guided DNA endonuclease in adaptive bacterial immunity.** *Science* 2012,  
505 **337**:816-821.
- 506 2. Cong L, Ran FA, Cox D, Lin S, Barretto R, Habib N, Hsu PD, Wu X, Jiang W, Marraffini LA,  
507 Zhang F: **Multiplex genome engineering using CRISPR/Cas systems.** *Science* 2013,  
508 **339**:819-823.
- 509 3. Mali P, Yang L, Esvelt KM, Aach J, Guell M, DiCarlo JE, Norville JE, Church GM: **RNA-**  
510 **guided human genome engineering via Cas9.** *Science* 2013, **339**:823-826.
- 511 4. Hu JH, Miller SM, Geurts MH, Tang W, Chen L, Sun N, Zeina CM, Gao X, Rees HA, Lin Z,  
512 Liu DR: **Evolved Cas9 variants with broad PAM compatibility and high DNA specificity.**  
513 *Nature* 2018, **556**:57-63.
- 514 5. Nishimasu H, Shi X, Ishiguro S, Gao L, Hirano S, Okazaki S, Noda T, Abudayyeh OO,  
515 Gootenberg JS, Mori H, et al: **Engineered CRISPR-Cas9 nuclease with expanded**  
516 **targeting space.** *Science* 2018, **361**:1259-1262.
- 517 6. Walton RT, Christie KA, Whittaker MN, Kleinstiver BP: **Unconstrained genome targeting**  
518 **with near-PAMless engineered CRISPR-Cas9 variants.** *Science* 2020, **368**:290-296.
- 519 7. Zhang Y, Malzahn AA, Sretenovic S, Qi Y: **The emerging and uncultivated potential of**  
520 **CRISPR technology in plant science.** *Nat Plants* 2019, **5**:778-794.
- 521 8. Hassan MM, Zhang Y, Yuan G, De K, Chen JG, Muchero W, Tuskan GA, Qi Y, Yang X:  
522 **Construct design for CRISPR/Cas-based genome editing in plants.** *Trends Plant Sci*  
523 2021.
- 524 9. Anzalone AV, Koblan LW, Liu DR: **Genome editing with CRISPR-Cas nucleases, base**  
525 **editors, transposases and prime editors.** *Nat Biotechnol* 2020, **38**:824-844.
- 526 10. Molla KA, Sretenovic S, Bansal KC, Qi Y: **Precise plant genome editing using base editors**  
527 **and prime editors.** *Nat Plants* 2021, **7**:1166-1187.
- 528 11. Jin S, Zong Y, Gao Q, Zhu Z, Wang Y, Qin P, Liang C, Wang D, Qiu JL, Zhang F, Gao C:  
529 **Cytosine, but not adenine, base editors induce genome-wide off-target mutations in**  
530 **rice.** *Science* 2019, **364**:292-295.
- 531 12. Ren Q, Sretenovic S, Liu G, Zhong Z, Wang J, Huang L, Tang X, Guo Y, Liu L, Wu Y, et al:  
532 **Improved plant cytosine base editors with high editing activity, purity, and specificity.**  
533 *Plant Biotechnol J* 2021.
- 534 13. Zuo E, Sun Y, Wei W, Yuan T, Ying W, Sun H, Yuan L, Steinmetz LM, Li Y, Yang H: **Cytosine**  
535 **base editor generates substantial off-target single-nucleotide variants in mouse**  
536 **embryos.** *Science* 2019, **364**:289-292.
- 537 14. Yu Y, Leete TC, Born DA, Young L, Barrera LA, Lee SJ, Rees HA, Ciaramella G, Gaudelli  
538 NM: **Cytosine base editors with minimized unguided DNA and RNA off-target events**  
539 **and high on-target activity.** *Nat Commun* 2020, **11**:2052.
- 540 15. Doman JL, Raguram A, Newby GA, Liu DR: **Evaluation and minimization of Cas9-**  
541 **independent off-target DNA editing by cytosine base editors.** *Nat Biotechnol* 2020,  
542 **38**:620-628.

- 543 16. Jin S, Fei H, Zhu Z, Luo Y, Liu J, Gao S, Zhang F, Chen YH, Wang Y, Gao C: **Rationally**  
544 **Designed APOBEC3B Cytosine Base Editors with Improved Specificity.** *Mol Cell* 2020,  
545 **79:728-740 e726.**
- 546 17. Lapinaite A, Knott GJ, Palumbo CM, Lin-Shiao E, Richter MF, Zhao KT, Beal PA, Liu DR,  
547 Doudna JA: **DNA capture by a CRISPR-Cas9-guided adenine base editor.** *Science* 2020,  
548 **369:566-571.**
- 549 18. Richter MF, Zhao KT, Eton E, Lapinaite A, Newby GA, Thuronyi BW, Wilson C, Koblan LW,  
550 Zeng J, Bauer DE, et al: **Phage-assisted evolution of an adenine base editor with**  
551 **improved Cas domain compatibility and activity.** *Nat Biotechnol* 2020, **38:883-891.**
- 552 19. Ren Q, Sretenovic S, Liu S, Tang X, Huang L, He Y, Liu L, Guo Y, Zhong Z, Liu G, et al: **PAM-**  
553 **less plant genome editing using a CRISPR-SpRY toolbox.** *Nat Plants* 2021, **7:25-33.**
- 554 20. Li J, Xu R, Qin R, Liu X, Kong F, Wei P: **Genome editing mediated by SpCas9 variants**  
555 **with broad non-canonical PAM compatibility in plants.** *Mol Plant* 2021, **14:352-360.**
- 556 21. Xu Z, Kuang Y, Ren B, Yan D, Yan F, Spetz C, Sun W, Wang G, Zhou X, Zhou H: **SpRY**  
557 **greatly expands the genome editing scope in rice with highly flexible PAM recognition.**  
558 *Genome Biol* 2021, **22:6.**
- 559 22. Wang Z, Liu X, Xie X, Deng L, Zheng H, Pan H, Li D, Li L, Zhong C: **ABE8e with**  
560 **Polycistronic tRNA-gRNA Expression Cassette Significantly Improves Adenine Base**  
561 **Editing Efficiency in *Nicotiana benthamiana*.** *Int J Mol Sci* 2021, **22.**
- 562 23. Wei C, Wang C, Jia M, Guo HX, Luo PY, Wang MG, Zhu JK, Zhang H: **Efficient generation**  
563 **of homozygous substitutions in rice in one generation utilizing an rABE8e base editor.**  
564 *J Integr Plant Biol* 2021, **63:1595-1599.**
- 565 24. Hua K, Tao X, Han P, Wang R, Zhu JK: **Genome Engineering in Rice Using Cas9 Variants**  
566 **that Recognize NG PAM Sequences.** *Mol Plant* 2019, **12:1003-1014.**
- 567 25. Zhong Z, Sretenovic S, Ren Q, Yang L, Bao Y, Qi C, Yuan M, He Y, Liu S, Liu X, et al:  
568 **Improving Plant Genome Editing with High-Fidelity xCas9 and Non-canonical PAM-**  
569 **Targeting Cas9-NG.** *Mol Plant* 2019, **12:1027-1036.**
- 570 26. Zeng D, Li X, Huang J, Li Y, Cai S, Yu W, Li Y, Huang Y, Xie X, Gong Q, et al: **Engineered**  
571 **Cas9 variant tools expand targeting scope of genome and base editing in rice.** *Plant*  
572 *Biotechnol J* 2020, **18:1348-1350.**
- 573 27. Li J, Luo J, Xu M, Li S, Zhang J, Li H, Yan L, Zhao Y, Xia L: **Plant genome editing using**  
574 **xCas9 with expanded PAM compatibility.** *J Genet Genomics* 2019, **46:277-280.**
- 575 28. Zeng D, Liu T, Tan J, Zhang Y, Zheng Z, Wang B, Zhou D, Xie X, Guo M, Liu YG, Zhu Q:  
576 **PhieCBEs: Plant High-Efficiency Cytidine Base Editors with Expanded Target Range.** *Mol*  
577 *Plant* 2020, **13:1666-1669.**
- 578 29. Endo M, Mikami M, Endo A, Kaya H, Itoh T, Nishimasu H, Nureki O, Toki S: **Genome**  
579 **editing in plants by engineered CRISPR-Cas9 recognizing NG PAM.** *Nat Plants* 2019,  
580 **5:14-17.**
- 581 30. Zhang C, Wang Y, Wang F, Zhao S, Song J, Feng F, Zhao J, Yang J: **Expanding base editing**  
582 **scope to near-PAMless with engineered CRISPR/Cas9 variants in plants.** *Mol Plant*  
583 2021, **14:191-194.**
- 584 31. Negishi K, Kaya H, Abe K, Hara N, Saika H, Toki S: **An adenine base editor with expanded**  
585 **targeting scope using SpCas9-NGv1 in rice.** *Plant Biotechnol J* 2019, **17:1476-1478.**

- 586 32. Wang M, Wang Z, Mao Y, Lu Y, Yang R, Tao X, Zhu JK: **Optimizing base editors for**  
587 **improved efficiency and expanded editing scope in rice.** *Plant Biotechnol J* 2019,  
588 **17**:1697-1699.
- 589 33. Ren J, Meng X, Hu F, Liu Q, Cao Y, Li H, Yan C, Li J, Wang K, Yu H, Wang C: **Expanding the**  
590 **scope of genome editing with SpG and SpRY variants in rice.** *Sci China Life Sci* 2021.
- 591 34. Tang X, Liu G, Zhou J, Ren Q, You Q, Tian L, Xin X, Zhong Z, Liu B, Zheng X, et al: **A large-**  
592 **scale whole-genome sequencing analysis reveals highly specific genome editing by**  
593 **both Cas9 and Cpf1 (Cas12a) nucleases in rice.** *Genome Biol* 2018, **19**:84.
- 594 35. Qin R, Li J, Liu X, Xu R, Yang J, Wei P: **SpCas9-NG self-targets the sgRNA sequence in**  
595 **plant genome editing.** *Nat Plants* 2020, **6**:197-201.
- 596 36. Bae S, Park J, Kim JS: **Cas-OFFinder: a fast and versatile algorithm that searches for**  
597 **potential off-target sites of Cas9 RNA-guided endonucleases.** *Bioinformatics* 2014,  
598 **30**:1473-1475.
- 599 37. Nishimura A, Aichi I, Matsuoka M: **A protocol for Agrobacterium-mediated**  
600 **transformation in rice.** *Nat Protoc* 2006, **1**:2796-2802.
- 601 38. Zhou C, Sun Y, Yan R, Liu Y, Zuo E, Gu C, Han L, Wei Y, Hu X, Zeng R, et al: **Off-target RNA**  
602 **mutation induced by DNA base editing and its elimination by mutagenesis.** *Nature*  
603 2019, **571**:275-278.
- 604 39. Gaudelli NM, Lam DK, Rees HA, Sola-Esteves NM, Barrera LA, Born DA, Edwards A,  
605 Gehrke JM, Lee SJ, Liquori AJ, et al: **Directed evolution of adenine base editors with**  
606 **increased activity and therapeutic application.** *Nat Biotechnol* 2020, **38**:892-900.
- 607 40. Xing S, Chen K, Zhu H, Zhang R, Zhang H, Li B, Gao C: **Fine-tuning sugar content in**  
608 **strawberry.** *Genome Biol* 2020, **21**:230.
- 609 41. Rodriguez-Leal D, Lemmon ZH, Man J, Bartlett ME, Lippman ZB: **Engineering**  
610 **Quantitative Trait Variation for Crop Improvement by Genome Editing.** *Cell* 2017,  
611 **171**:470-480 e478.
- 612 42. Tang X, Ren Q, Yang L, Bao Y, Zhong Z, He Y, Liu S, Qi C, Liu B, Wang Y, et al: **Single**  
613 **transcript unit CRISPR 2.0 systems for robust Cas9 and Cas12a mediated plant genome**  
614 **editing.** *Plant Biotechnol J* 2019, **17**:1431-1445.
- 615 43. Fossi M, Amundson K, Kuppu S, Britt A, Comai L: **Regeneration of Solanum tuberosum**  
616 **Plants from Protoplasts Induces Widespread Genome Instability.** *Plant Physiol* 2019,  
617 **180**:78-86.
- 618 44. Altpeter F, Springer NM, Bartley LE, Blechl AE, Brutnell TP, Citovsky V, Conrad LJ, Gelvin  
619 SB, Jackson DP, Kausch AP, et al: **Advancing Crop Transformation in the Era of Genome**  
620 **Editing.** *Plant Cell* 2016, **28**:1510-1520.
- 621 45. Lowe K, Wu E, Wang N, Hoerster G, Hastings C, Cho MJ, Scelonge C, Lenderts B,  
622 Chamberlin M, Cushatt J, et al: **Morphogenic Regulators Baby boom and Wuschel**  
623 **Improve Monocot Transformation.** *Plant Cell* 2016.
- 624 46. Debernardi JM, Tricoli DM, Ercoli MF, Hayta S, Ronald P, Palatnik JF, Dubcovsky J: **A GRF-**  
625 **GIF chimeric protein improves the regeneration efficiency of transgenic plants.** *Nat*  
626 *Biotechnol* 2020, **38**:1274-1279.
- 627 47. Maher MF, Nasti RA, Vollbrecht M, Starker CG, Clark MD, Voytas DF: **Plant gene editing**  
628 **through de novo induction of meristems.** *Nat Biotechnol* 2020, **38**:84-89.

- 629 48. Zhou J, Deng K, Cheng Y, Zhong Z, Tian L, Tang X, Tang A, Zheng X, Zhang T, Qi Y, Zhang  
630 Y: **CRISPR-Cas9 based genome editing reveals new insights into microRNA function and**  
631 **regulation in rice.** *Frontiers in Plant Science* 2017, **8**:1598.
- 632 49. Zhou J, Zhang R, Jia X, Tang X, Guo Y, Yang H, Zheng X, Qian Q, Qi Y, Zhang Y: **CRISPR-**  
633 **Cas9 mediated OsMIR168a knockout reveals its pleiotropy in rice.** *Plant Biotechnol J*  
634 2021.
- 635 50. Zhou J, Yuan M, Zhao Y, Quan Q, Yu D, Yang H, Tang X, Xin X, Cai G, Qian Q, et al:  
636 **Efficient deletion of multiple circle RNA loci by CRISPR-Cas9 reveals Os06circ02797 as a**  
637 **putative sponge for OsMIR408 in rice.** *Plant Biotechnol J* 2021, **19**:1240-1252.
- 638 51. Tang X, Lowder LG, Zhang T, Malzahn AA, Zheng X, Voytas DF, Zhong Z, Chen Y, Ren Q, Li  
639 Q, et al: **A CRISPR-Cpf1 system for efficient genome editing and transcriptional**  
640 **repression in plants.** *Nat Plants* 2017, **3**:17018.
- 641 52. Zhang Y, Zhang F, Li X, Baller JA, Qi Y, Starker CG, Bogdanove AJ, Voytas DF:  
642 **Transcription activator-like effector nucleases enable efficient plant genome**  
643 **engineering.** *Plant Physiol* 2013, **161**:20-27.
- 644 53. You Q, Zhong Z, Ren Q, Hassan F, Zhang Y, Zhang T: **CRISPRMatch: An Automatic**  
645 **Calculation and Visualization Tool for High-throughput CRISPR Genome-editing Data**  
646 **Analysis.** *Int J Biol Sci* 2018, **14**:858-862.
- 647 54. Hiei Y, Ohta S, Komari T, Kumashiro T: **Efficient transformation of rice (*Oryza sativa* L.)**  
648 **mediated by *Agrobacterium* and sequence analysis of the boundaries of the T-DNA.**  
649 *Plant J* 1994, **6**:271-282.
- 650 55. Zhou J, Xin X, He Y, Chen H, Li Q, Tang X, Zhong Z, Deng K, Zheng X, Akher SA, et al:  
651 **Multiplex QTL editing of grain-related genes improves yield in elite rice varieties.** *Plant*  
652 *Cell Rep* 2019, **38**:475-485.
- 653 56. Wang B, Zhaohui Z, Huanhuan Z, Xia W, Binglin L, Lijia Y, Xiangyan H, Deshui Y, Xuelian Z,  
654 Chunguo W, et al: **Targeted mutagenesis of NAC transcription factor gene, OsNAC041,**  
655 **leading to salt sensitivity in rice.** *Rice Science* 2019, **26**:98-108.
- 656 57. Stewart CN, Jr., Via LE: **A rapid CTAB DNA isolation technique useful for RAPD**  
657 **fingerprinting and other PCR applications.** *Biotechniques* 1993, **14**:748-750.
- 658 58. Zheng X, Yang S, Zhang D, Zhong Z, Tang X, Deng K, Zhou J, Qi Y, Zhang Y: **Effective**  
659 **screen of CRISPR/Cas9-induced mutants in rice by single-strand conformation**  
660 **polymorphism.** *Plant Cell Rep* 2016, **35**:1545-1554.
- 661 59. Jiang H, Lei R, Ding SW, Zhu S: **Skewer: a fast and accurate adapter trimmer for next-**  
662 **generation sequencing paired-end reads.** *BMC Bioinformatics* 2014, **15**:182.
- 663 60. Li H, Durbin R: **Fast and accurate long-read alignment with Burrows-Wheeler**  
664 **transform.** *Bioinformatics* 2010, **26**:589-595.
- 665 61. Li H, Handsaker B, Wysoker A, Fennell T, Ruan J, Homer N, Marth G, Abecasis G, Durbin  
666 R, Proc GPD: **The Sequence Alignment/Map format and SAMtools.** *Bioinformatics* 2009,  
667 **25**:2078-2079.
- 668 62. McKenna A, Hanna M, Banks E, Sivachenko A, Cibulskis K, Kernytzky A, Garimella K,  
669 Altshuler D, Gabriel S, Daly M, DePristo MA: **The Genome Analysis Toolkit: A**  
670 **MapReduce framework for analyzing next-generation DNA sequencing data.** *Genome*  
671 *Research* 2010, **20**:1297-1303.

- 672 63. Wilm A, Aw PPK, Bertrand D, Yeo GHT, Ong SH, Wong CH, Khor CC, Petric R, Hibberd ML,  
673 Nagarajan N: **LoFreq: a sequence-quality aware, ultra-sensitive variant caller for**  
674 **uncovering cell-population heterogeneity from high-throughput sequencing datasets.**  
675 *Nucleic Acids Research* 2012, **40**:11189-11201.
- 676 64. Cibulskis K, Lawrence MS, Carter SL, Sivachenko A, Jaffe D, Sougnez C, Gabriel S,  
677 Meyerson M, Lander ES, Getz G: **Sensitive detection of somatic point mutations in**  
678 **impure and heterogeneous cancer samples.** *Nature Biotechnology* 2013, **31**:213-219.
- 679 65. Koboldt DC, Zhang Q, Larson DE, Shen D, McLellan MD, Lin L, Miller CA, Mardis ER, Ding  
680 L, Wilson RK: **VarScan 2: somatic mutation and copy number alteration discovery in**  
681 **cancer by exome sequencing.** *Genome Res* 2012, **22**:568-576.
- 682 66. Kim S, Scheffler K, Halpern AL, Bekritsky MA, Noh E, Kallberg M, Chen XY, Kim Y, Beyter  
683 D, Krusche P, Saunders CT: **Strelka2: fast and accurate calling of germline and somatic**  
684 **variants.** *Nature Methods* 2018, **15**:591-+.
- 685 67. Li H: **A statistical framework for SNP calling, mutation discovery, association mapping**  
686 **and population genetical parameter estimation from sequencing data.** *Bioinformatics*  
687 2011, **27**:2987-2993.
- 688 68. Thorvaldsdottir H, Robinson JT, Mesirov JP: **Integrative Genomics Viewer (IGV): high-**  
689 **performance genomics data visualization and exploration.** *Briefings in Bioinformatics*  
690 2013, **14**:178-192.
- 691 69. Krzywinski M, Schein J, Birol I, Connors J, Gascoyne R, Horsman D, Jones SJ, Marra MA:  
692 **Circos: An information aesthetic for comparative genomics.** *Genome Research* 2009,  
693 **19**:1639-1645.
- 694 70. Crooks GE, Hon G, Chandonia JM, Brenner SE: **WebLogo: A sequence logo generator.**  
695 *Genome Research* 2004, **14**:1188-1190.  
696

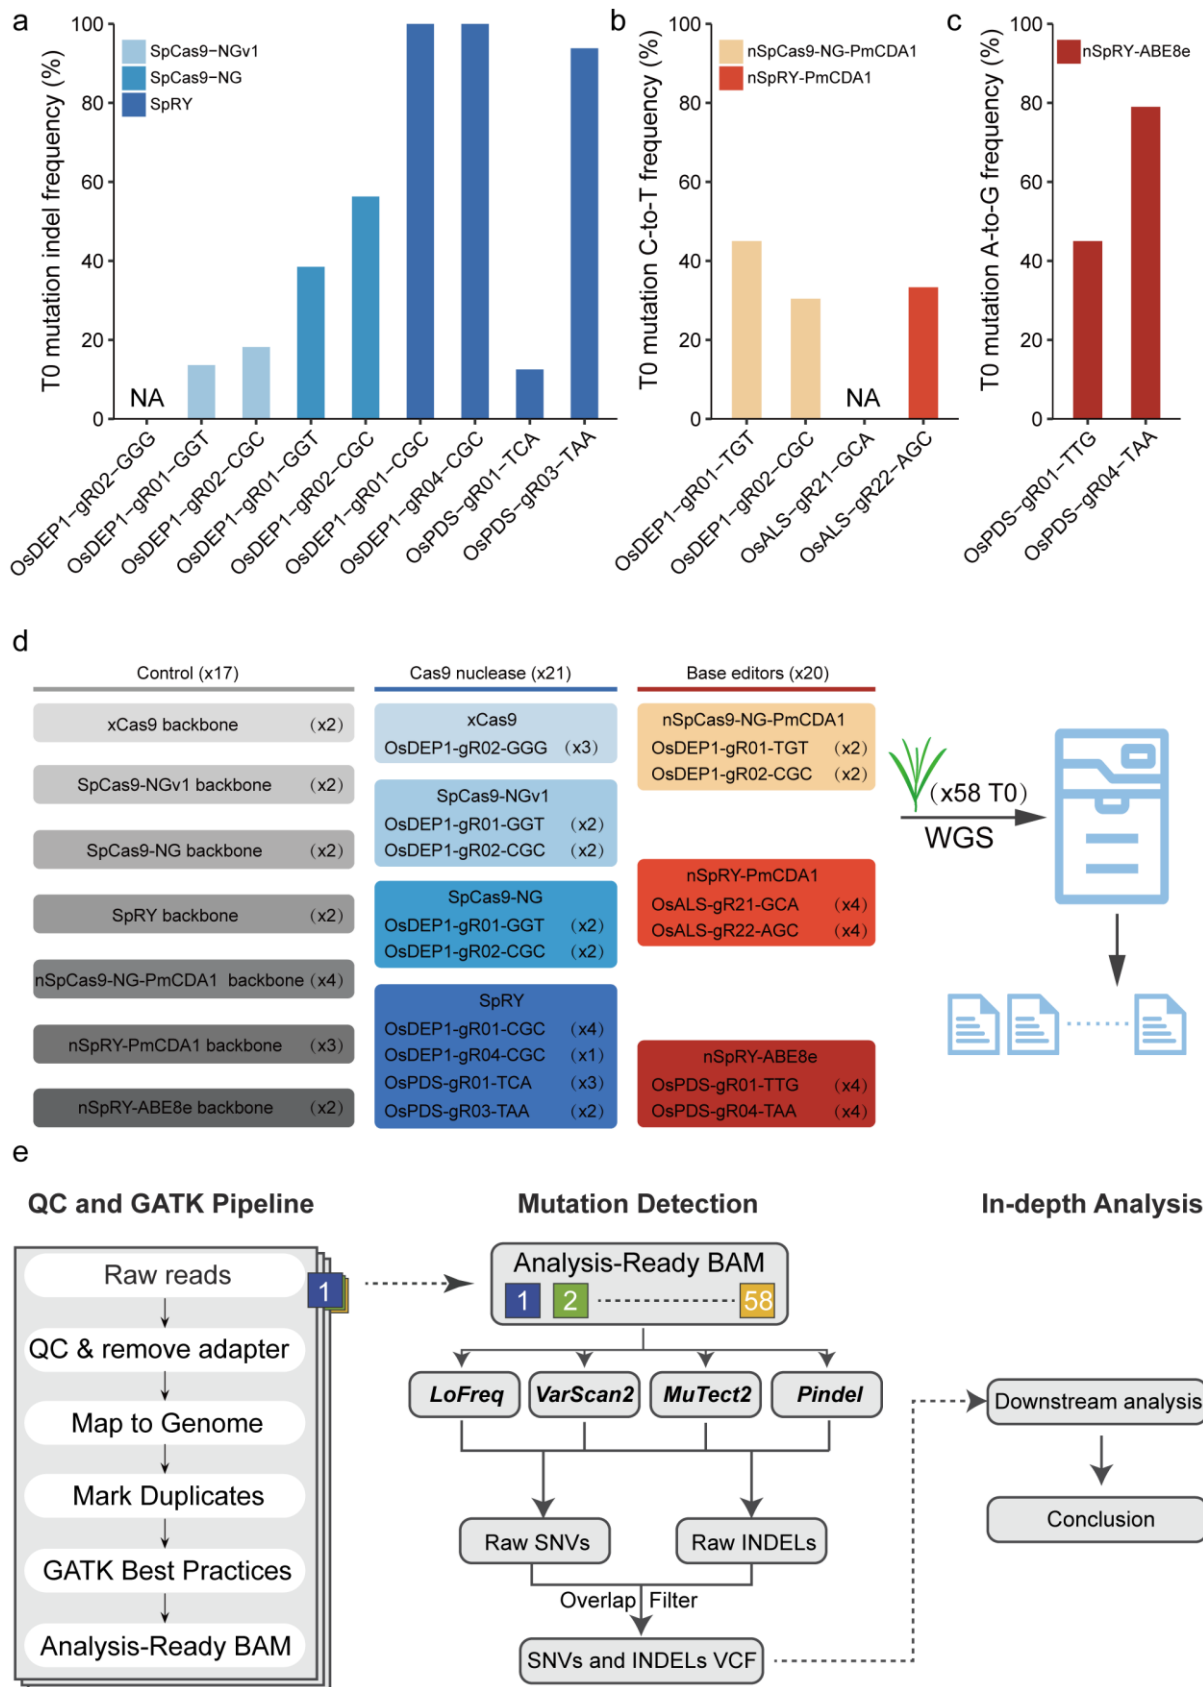

**Figure 1. Assessment of PAM-less genome editing in rice by whole-genome sequencing.** **a-c**, genome editing frequencies in T0 lines by PAM-relaxed Cas9-NGv1, Cas9-NG and SpRY (**a**), by PAM-relaxed cytosine base editors based on nCas9-NG and nSpRY (**b**), and by PAM-less nSpRY-ABE8e adenine base editor (**c**). **d**, Summary of plants used for whole-genome sequencing. **e**, The bioinformatic pipeline for analysis of whole-genome sequencing (WGS) data. NA, editing frequency in T0 lines was not scored for the constructs xCas9-OsDEP1-gR02-GGG and nSpRY-PmCDA1-OsALS-gR21-GCA.



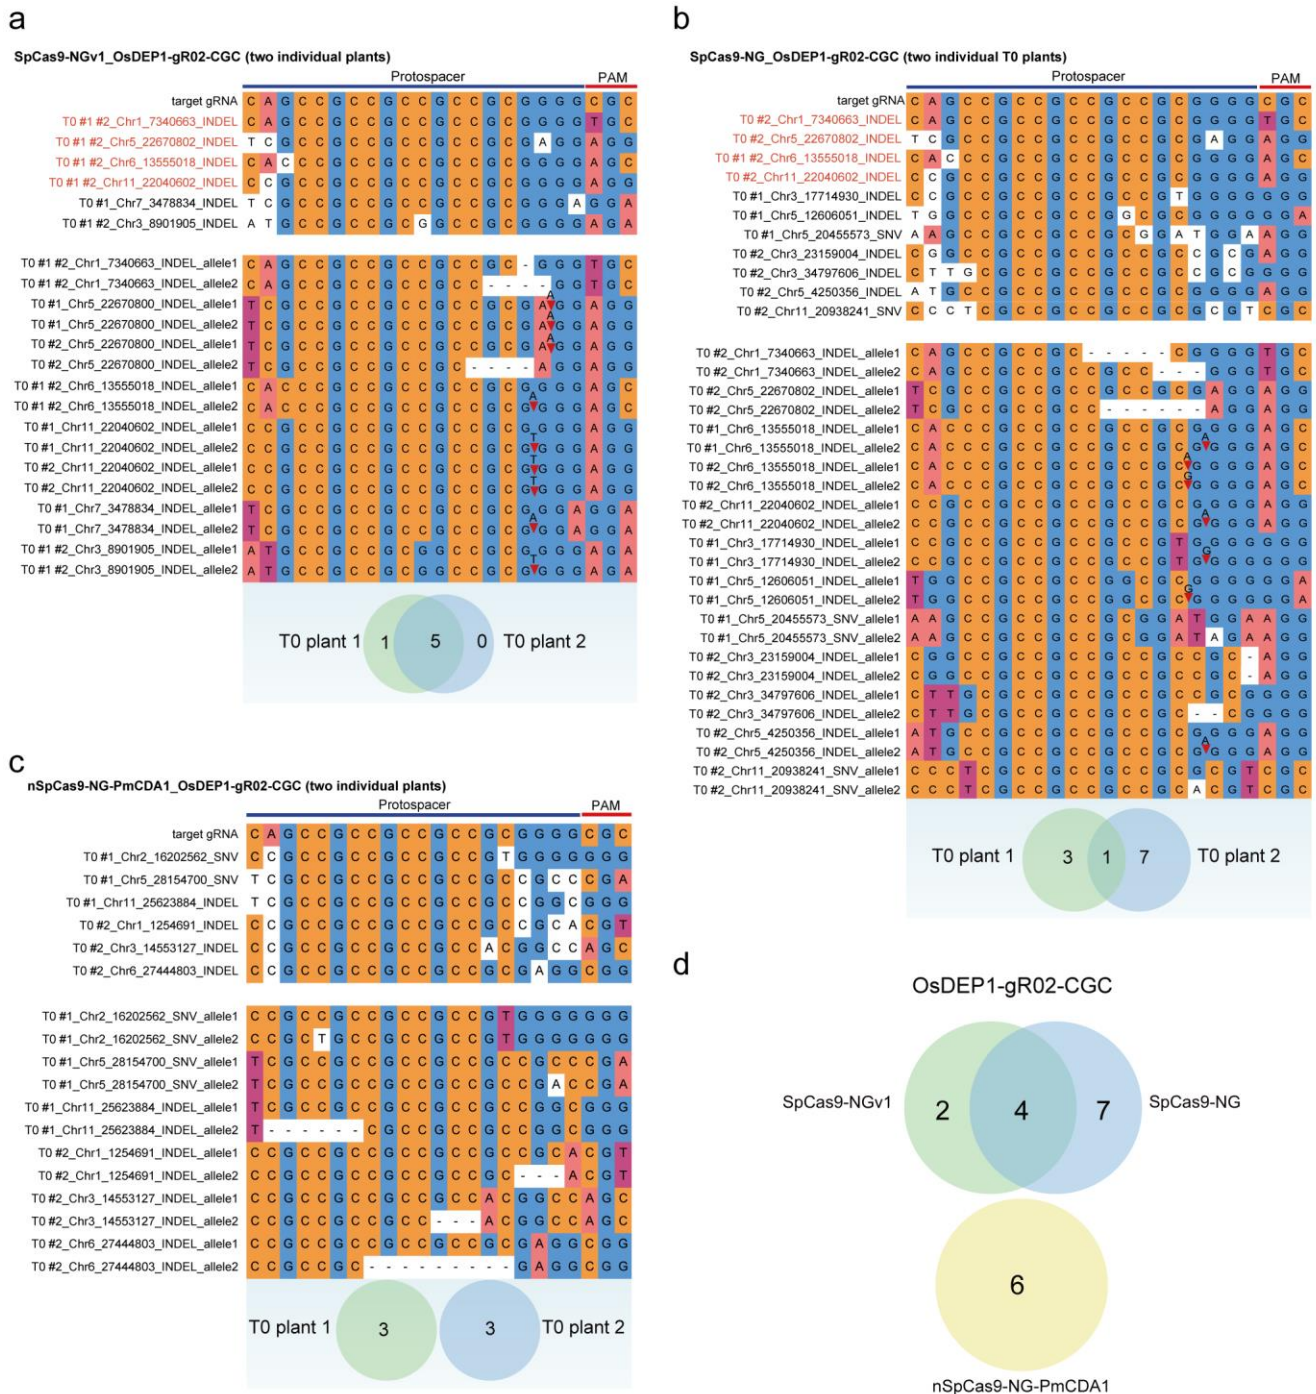

**Figure 2. Different sequence preference of guide RNA (gRNA)-dependent potential off-target editing by Cas9-NG nucleases and cytosine base editors.** **a-c**, gRNA-dependent off-target mutations in edited T0 lines at the OsDEP1-gR02-CGC site by SpCas9-NGv1 (**a**), SpCas9-NG (**b**), and nSpCas9-PmCDA1 (**c**). Off-target sites that were shared between SpCas9-NGv1 and SpCas9-NG are marked in red. Top panel, sequence comparison of target gRNA and potential off-target sites. Middle panel, the genotype of the off-target sites. Bottom panel, the number of potential off-target sites in two T0 plants. **d**, Venn diagram showed many shared off-target sites induced by the OsDEP1-gR02-CGC gRNA in SpCas9-NGv1 and SpCas9-NG, while not in nCas9-NG-PmCDA1.

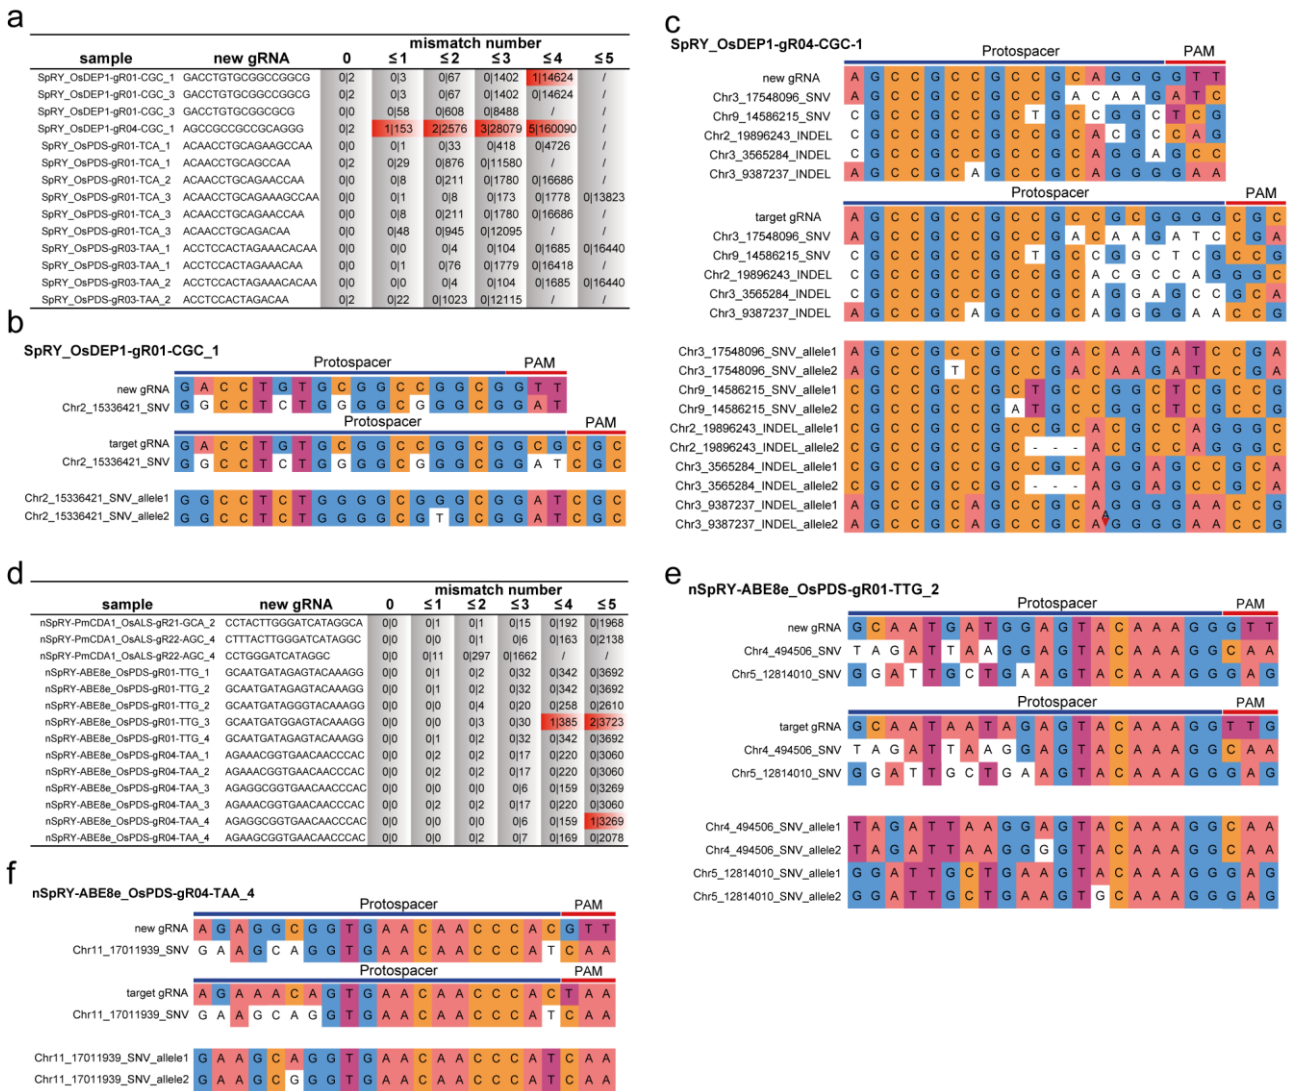

**Figure 3. Genome-wide landscape of gRNA-dependent off-target mutations by *de novo* generated new sgRNAs by SpRY editors. a, d, off-target analysis for *de novo* generated new gRNAs due to on-target editing by SpRY nuclease, nSpRY-PmCDA1 and nSpRY-ABE8e. The number of off-target sites overlapping identified mutation (SNVs+INDELs) versus the number of all potential off-target sites that predicted by Cas-OFFinder. b-c, gRNA-dependent off-target mutations in T0 lines by *de novo* generated new gRNAs by SpRY at the OsDEP1-gR01-CGC site (b) and the OsDEP1-gR04-CGC-1 site (c). Top panel, sequence comparison of new gRNA and potential off-target sites. Middle panel, sequence comparison of target gRNA and potential off-target sites. Bottom panel, the genotype of the off-target sites. e-f, gRNA-dependent off-target mutations by *de novo* generated new gRNAs by nSpRY-ABE8e at the OsPDS-gR01-TTG-2 site (e) and OsPDS-gR04-TAA-4 site (f).**

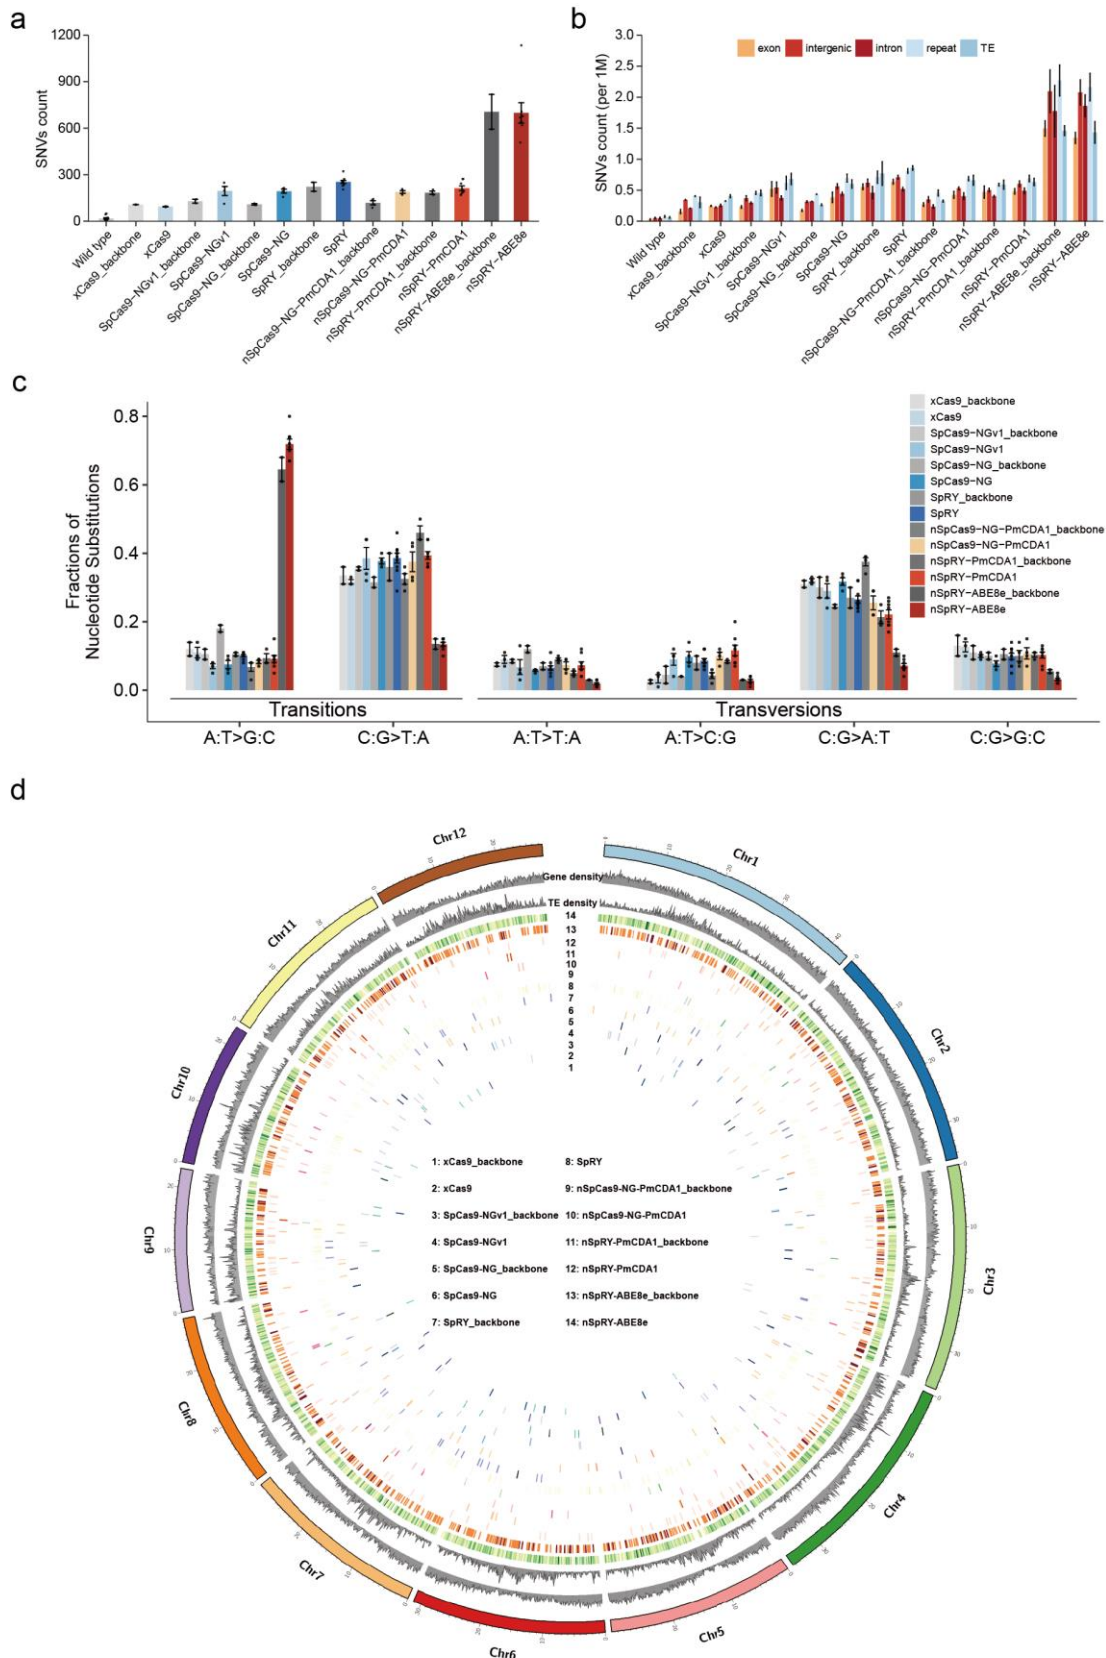

**Figure 4. Genome-wide sgRNA-independent off-target effects by PAM-relaxed nucleases, cytosine base editors, and adenine base editors.** **a**, Number of single nucleotide variation (SNV) mutations in all sequenced samples. **b**, Average number of SNV mutations in per 1 Mbp genomic region. **c**, Fractions of different nucleotide substitutions in different samples. **d**, Genome-wide distribution of A-to-G SNVs in all sequenced samples. **a-c**, Error bars represent s.e.m. and dots represent individual plants.

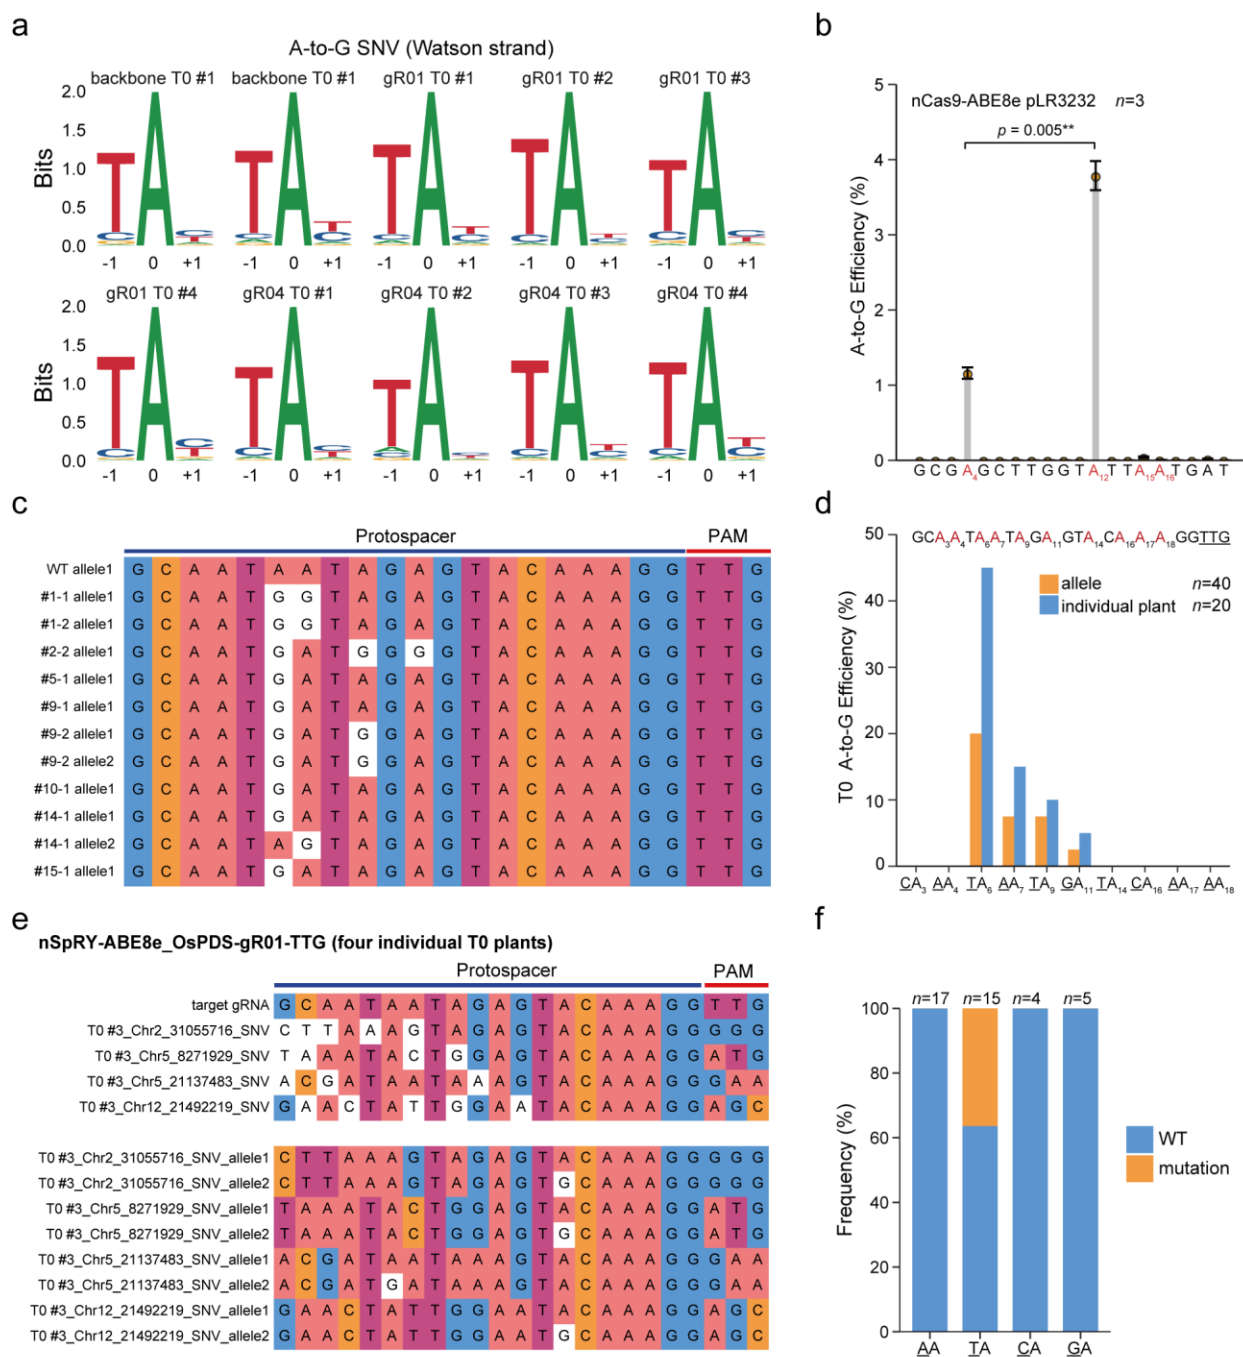

**Figure 5. ABE8e favors A-to-G conversion at TA motifs at both off-target and on-target sites.** **a**, Preference of a TA motif by ABE8e at gRNA-independent off-target A-to-G base editing in Watson strand, 0 indicates the A-to-G SNV position. **b**, Base editing frequencies at different protospacer positions by ABE8e at a target site in rice protoplasts,  $n$  represents biological replicates. Data reanalyzed from ref<sup>19</sup>. Error bars represent s.e.m.  $p$ -value was calculated by the one-sided paired Student's t-Test, \*  $p < 0.05$ , \*\*  $p < 0.01$ . **c**, The genotype of mutation alleles in T<sub>0</sub> stable transformation plants. **d**, Base editing frequencies at different protospacer positions by ABE8e at a target site in rice T<sub>0</sub> lines. **e**, Presence of TA motifs at the target site appears to increase gRNA-dependent off-target A-to-G editing. **f**, The frequency of A-to-G SNV with different di-nucleic acids in T<sub>0</sub> stable transformation plants.

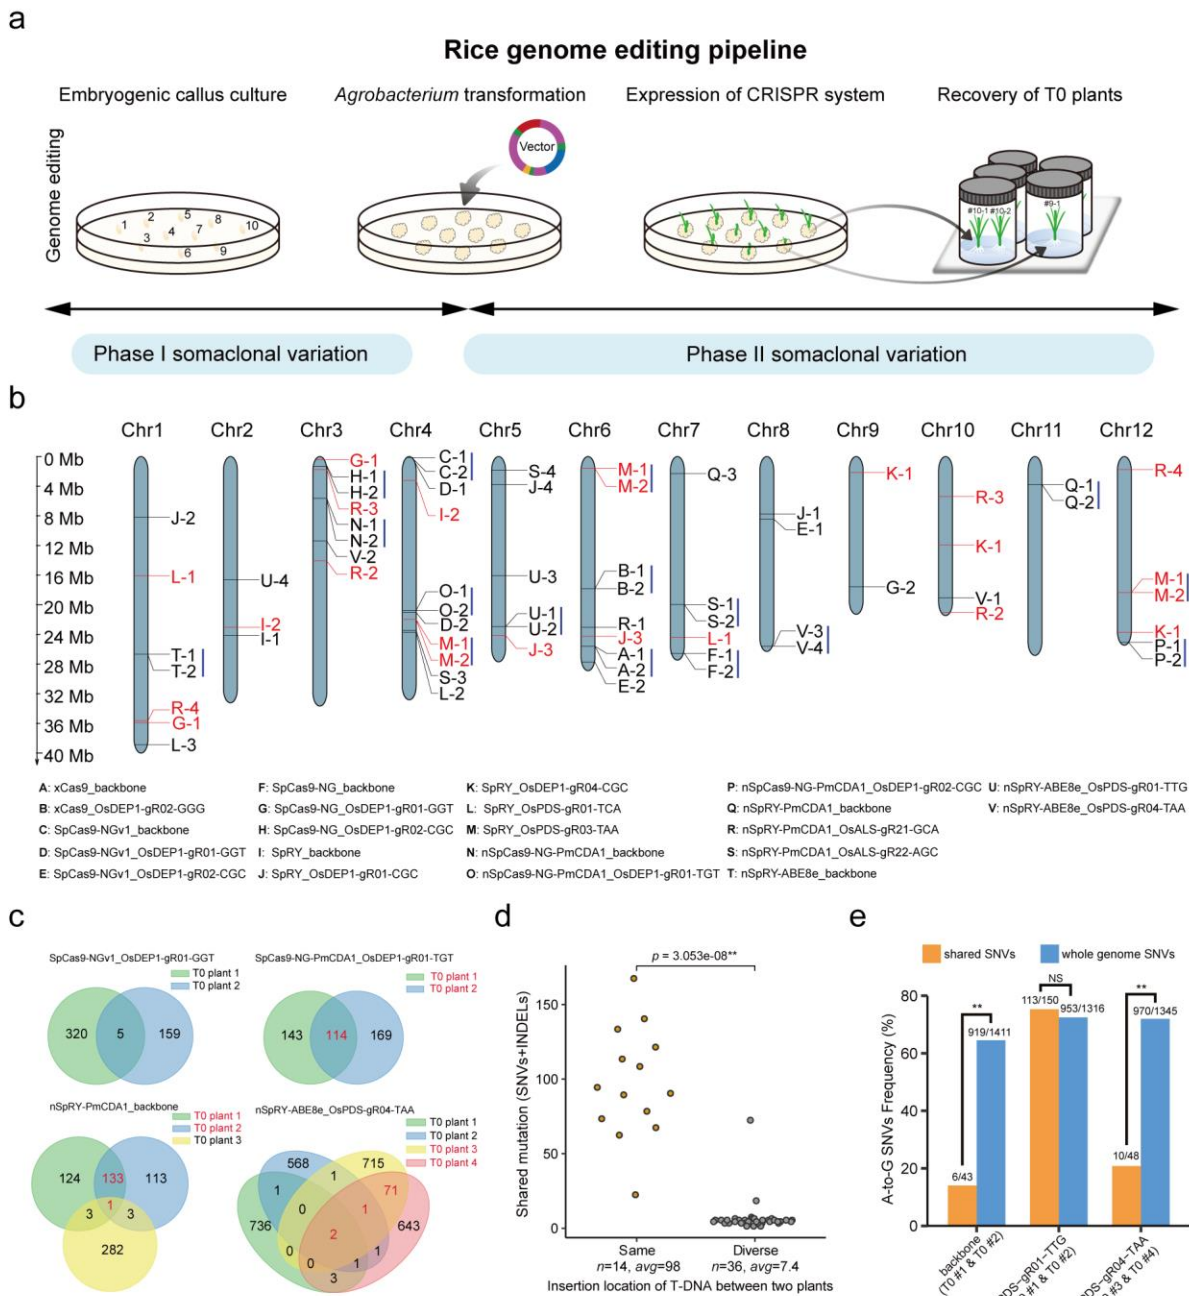

**Figure 6. Investigation of somaclonal variation production in rice tissue culture.**

**a**, A model that divides the generation of somaclonal variation into two phases, which points to potential of minimizing Phase II somaclonal variation with the use of morganic factors to accelerate plant regeneration. **b**, Genome-wide mapping of T-DNA integration sites for all  $T_0$  lines. Constructs that contain more than one T-DNA integration site are highlighted in red. The two  $T_0$  lines that carry the same T-DNA integration site were grouped by a solid line on the right, indicating they are from the same transgenic event. **c**, Four examples for the analysis of  $T_0$  lines for shared mutations revealed by WGS. The  $T_0$  lines resulting from the same transgenic event (highlighted in red) share a significant portion of mutations (termed Phase I somaclonal variation). **d**,  $T_0$  lines with the same T-DNA integration sites share an average of 98 mutations, while  $T_0$  lines with different T-DNA integration sites barely share any mutations. **e**, the frequency of A-to-G SNVs in shared SNVs and whole genome SNVs from the nSPRY-ABE8e  $T_0$  lines with the same transgenic events, the number above of each bar represents A-to-G SNVs versus all SNVs in a pair of  $T_0$  lines.  $p$ -value was calculated by the Wilcoxon rank sum test, \*  $p < 0.05$ , \*\*  $p < 0.01$ , NS represents not significant.

a

SpRY\_OsDEP1-gR01-CGC (four individual T0 plants)

|                                    | Protospacer |   |   |   |   |   |   |   |   |   |   |   | PAM |   |   |   |   |   |   |   |   |   |   |   |   |   |
|------------------------------------|-------------|---|---|---|---|---|---|---|---|---|---|---|-----|---|---|---|---|---|---|---|---|---|---|---|---|---|
| target gRNA                        | G           | A | C | C | T | G | T | G | C | G | G | C | C   | G | G | C | G | G | C | G | G | A | T |   |   |   |
| T0 #1_#2_#3_#4_Chr8_22381117_INDEL | G           | A | C | C | T | G | T | G | C | G | G | C | C   | G | G | C | G | G | C | G | G | C | T |   |   |   |
| T0 #3_Chr3_6091712_INDEL           | G           | T | T | C | T | G | T | G | C | G | G | C | G   | G | C | G | G | C | G | C | G | G | G |   |   |   |
| T0 #3_Chr4_32177979_INDEL          | A           | A | C | C | T | G | T | G | C | A | G | C | C   | G | G | C | G | G | C | G | C | G | C |   |   |   |
| T0 #1_Chr8_22381117_INDEL_allele1  | G           | A | C | C | T | G | T | G | C | G | G | C | C   | G | G | C | - | G | C | G | G | C | T |   |   |   |
| T0 #1_Chr8_22381117_INDEL_allele2  | G           | A | C | C | T | G | T | G | C | G | G | C | C   | - | - | - | - | G | C | G | G | C | T |   |   |   |
| T0 #2_Chr8_22381117_INDEL_allele1  | G           | A | C | C | T | G | T | G | C | G | G | C | C   | G | G | C | - | G | C | G | G | C | T |   |   |   |
| T0 #2_Chr8_22381117_INDEL_allele2  | G           | A | C | C | T | G | T | G | C | G | G | C | -   | - | - | - | G | G | C | G | G | C | T |   |   |   |
| T0 #3_Chr8_22381117_INDEL_allele1  | G           | A | C | C | T | G | T | G | C | G | G | C | C   | - | - | - | - | - | - | - | - | - | G | C | T |   |
| T0 #3_Chr8_22381117_INDEL_allele2  | G           | A | C | C | T | G | T | G | C | G | G | C | C   | - | - | - | - | - | - | - | - | - | - | G | C | T |
| T0 #4_Chr8_22381117_INDEL_allele1  | G           | A | C | C | T | G | T | G | C | G | G | C | -   | - | - | - | G | G | C | G | G | C | T |   |   |   |
| T0 #4_Chr8_22381117_INDEL_allele2  | G           | A | C | C | T | G | T | G | C | G | G | C | C   | - | - | - | - | G | C | G | G | C | T |   |   |   |
| T0 #3_Chr3_6091712_INDEL_allele1   | G           | T | T | C | T | G | T | G | C | G | G | C | G   | G | C | G | G | C | G | C | G | G | G |   |   |   |
| T0 #3_Chr3_6091712_INDEL_allele2   | G           | T | T | C | T | G | T | G | C | G | G | C | C   | G | G | C | G | C | G | - | - | - | C | G | G |   |
| T0 #3_Chr4_32177979_INDEL_allele1  | A           | A | C | C | T | G | T | G | C | A | G | C | C   | G | G | C | G | G | C | G | C | G | C | G | C |   |
| T0 #3_Chr4_32177979_INDEL_allele2  | A           | A | C | C | T | G | T | G | C | A | G | C | C   | G | G | C | G | - | - | - | - | - | - | C | G | C |

b

SpRY\_OsDEP1-gR04-CGC (one individual T0 plant)

|                                    | Protospacer |   |   |   |   |   |   |   |   |   |   |   | PAM |   |   |   |   |   |   |   |   |   |   |   |   |
|------------------------------------|-------------|---|---|---|---|---|---|---|---|---|---|---|-----|---|---|---|---|---|---|---|---|---|---|---|---|
| target gRNA                        | A           | G | C | C | G | C | C | G | C | C | G | C | C   | G | C | G | G | G | G | C | G | C | G |   |   |
| T0 #1_Chr1_2966649_SNV             | C           | G | C | C | G | C | C | G | C | C | G | C | C   | G | C | C | G | C | G | C | G | C | G | T | T |
| T0 #1_Chr11_16212800_SNV           | A           | G | C | C | A | C | C | G | C | C | G | C | C   | G | C | G | C | G | C | G | T | G | C | G |   |
| T0 #1_Chr1_7340666_INDEL           | A           | G | C | C | G | C | C | G | C | C | G | C | C   | G | C | C | G | G | G | G | T | G | C | G |   |
| T0 #1_Chr1_24946818_INDEL          | G           | G | C | C | G | C | C | G | C | C | G | C | C   | G | C | G | C | G | G | G | A | A | A | A |   |
| T0 #1_Chr2_30593608_INDEL          | C           | G | C | C | G | C | C | G | C | C | G | C | C   | G | C | G | G | G | G | C | G | C | G | G |   |
| T0 #1_Chr2_35075445_INDEL          | C           | G | C | C | G | C | C | G | C | C | G | C | C   | G | C | C | G | G | G | G | A | T | G | C |   |
| T0 #1_Chr3_8181621_INDEL           | C           | G | C | C | G | C | C | G | C | C | G | C | C   | G | C | G | G | G | G | A | G | A | G | G |   |
| T0 #1_Chr4_33822591_INDEL          | C           | C | C | C | G | C | C | G | C | C | G | C | C   | G | A | G | G | G | A | G | A | G | A | G |   |
| T0 #1_Chr5_22670801_INDEL          | C           | G | C | C | G | C | C | G | C | C | G | C | C   | G | C | G | A | G | A | G | A | G | G | G |   |
| T0 #1_Chr5_23978561_INDEL          | T           | G | C | T | G | C | T | G | C | C | G | C | C   | T | T | G | G | G | G | T | T | T | T | T |   |
| T0 #1_Chr6_30619804_INDEL          | G           | G | C | C | G | C | C | G | C | C | G | C | C   | G | C | G | G | A | G | A | A | C | A | C |   |
| T0 #1_Chr7_3478834_INDEL           | C           | G | C | C | G | C | C | G | C | C | G | C | C   | G | C | G | G | G | A | G | G | A | A | A |   |
| T0 #1_Chr10_17258213_INDEL         | C           | G | C | C | G | C | C | G | C | C | G | C | C   | G | A | G | G | G | A | A | A | A | A | A |   |
| T0 #1_Chr12_17302722_INDEL         | C           | G | C | C | G | C | C | G | C | C | G | C | C   | G | C | G | C | G | C | G | C | G | T | T |   |
| T0 #1_Chr12_21312569_INDEL         | C           | A | C | C | G | C | C | G | C | C | G | C | C   | G | C | G | G | G | A | A | A | A | A | G |   |
| T0 #1_Chr12_21312569_INDEL_allele1 | C           | A | C | C | G | C | C | G | C | C | G | C | C   | G | C | G | G | G | A | A | A | A | A | G |   |
| T0 #1_Chr12_21312569_INDEL_allele2 | C           | A | C | C | G | C | C | G | C | C | G | C | C   | G | C | G | G | G | - | A | A | A | A | G |   |

Supplementary Fig 1. Guide RNA-dependent off-target mutagenesis by SpRY. a-b, gRNA-dependent off-target mutations in edited T0 lines at the OsDEP1-gR01-CGC site (a) and OsDEP1-gR04-CGC site (b).

**nSpRY-ABE8e\_OsPDS-gR04-TAA (four individual T0 plants)**

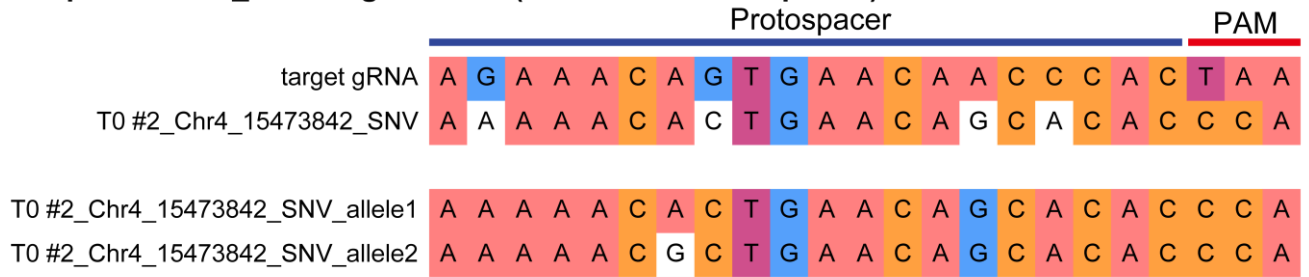

**Supplementary Fig 2. Guide RNA-dependent off-target mutagenesis by nSpRY-ABE8e at OsPDS-gR04-TAA site.**

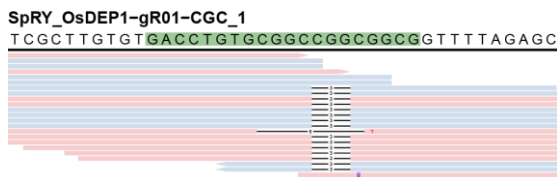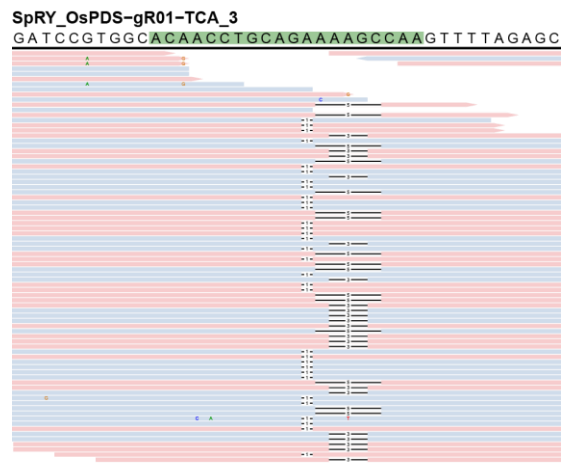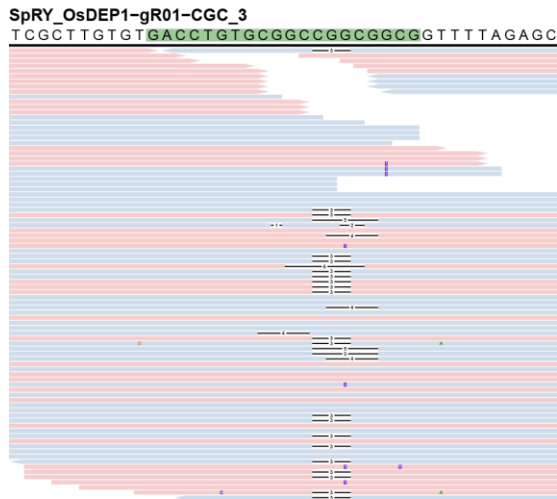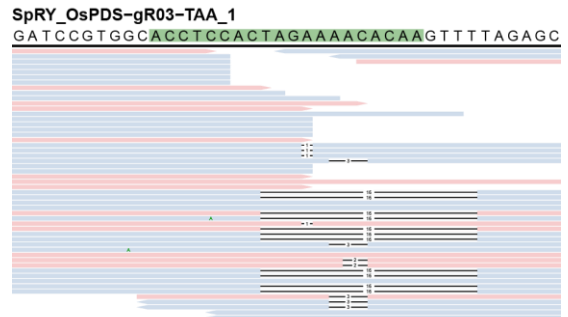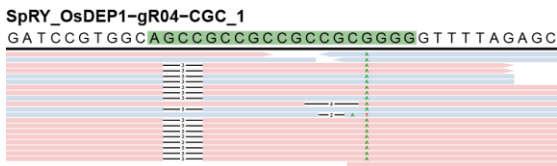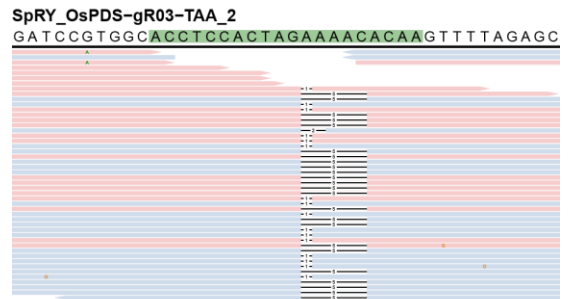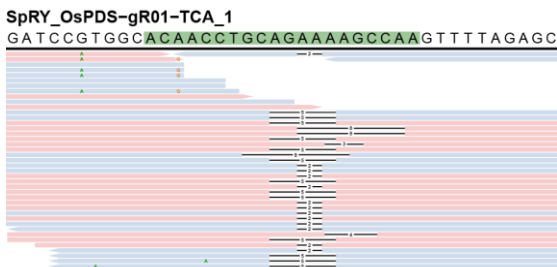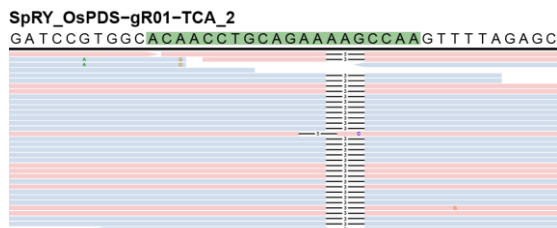

**Supplementary Fig 3. Sequencing reads indicative for T-DNA self-editing by SpRY constructs.** Protospacer sequences are marked by green rectangles. Insertions are marked by purple boxes. Deletions are marked by black dashes. Mismatches are marked by colored bases.



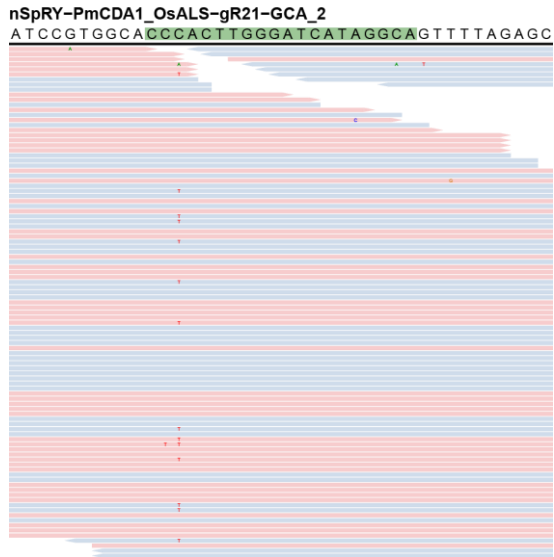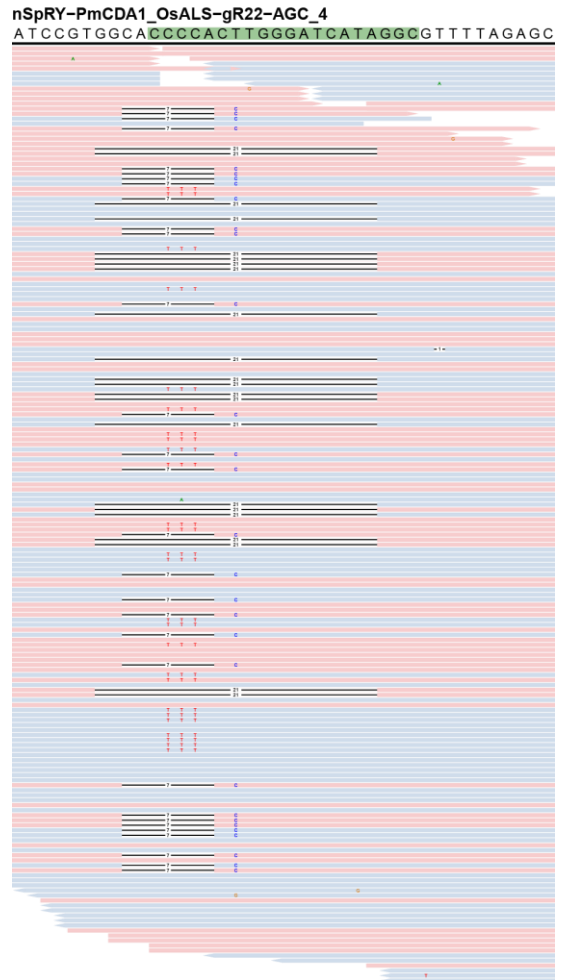

**Supplementary Fig 4. Sequencing reads indicative for T-DNA self-editing by nSpRY-PmCDA1 constructs.** Protospacer sequences are marked by green rectangles. Insertions are marked by purple boxes. Deletions are marked by black dashes. Mismatches are marked by colored bases.

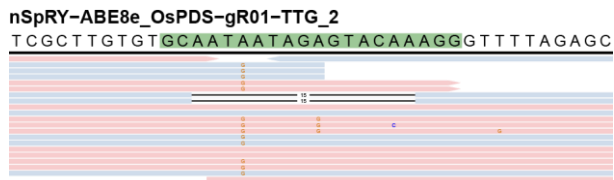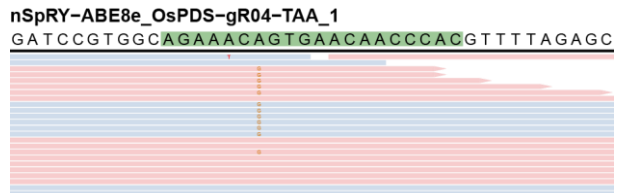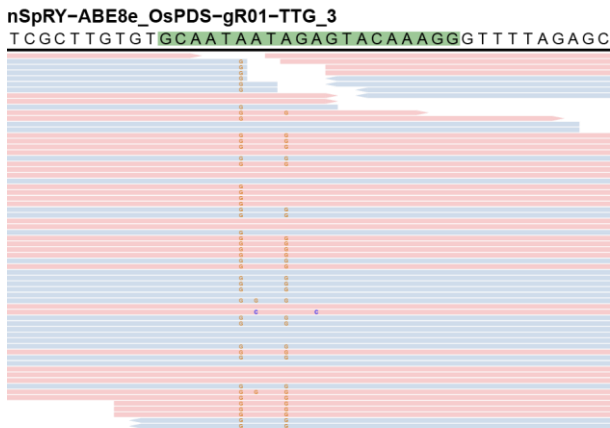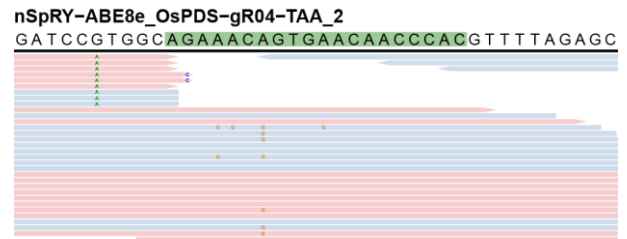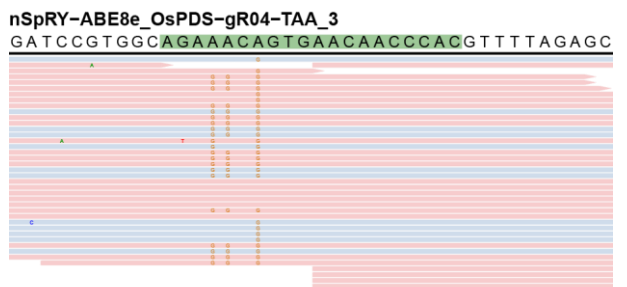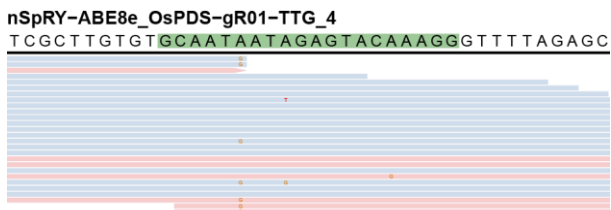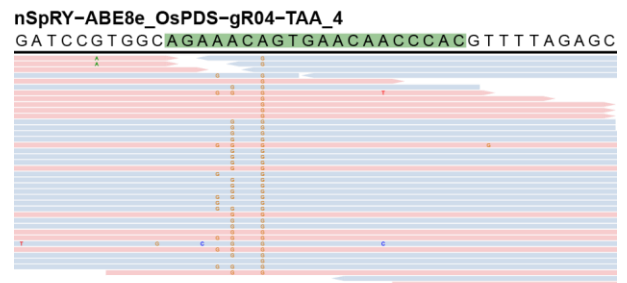

**Supplementary Fig 5. Sequencing reads indicative for T-DNA self-editing by nSpRY-ABE8e constructs.** Protospacer sequences are marked by green rectangles. Insertions are marked by purple boxes. Deletions are marked by black dashes. Mismatches are marked by colored bases.

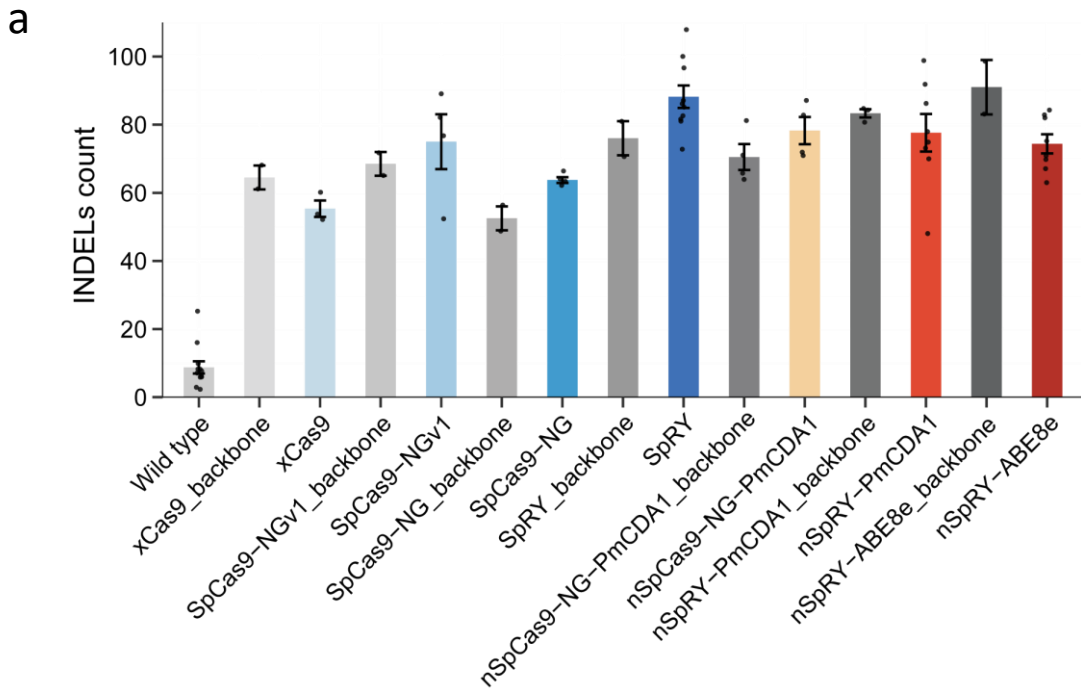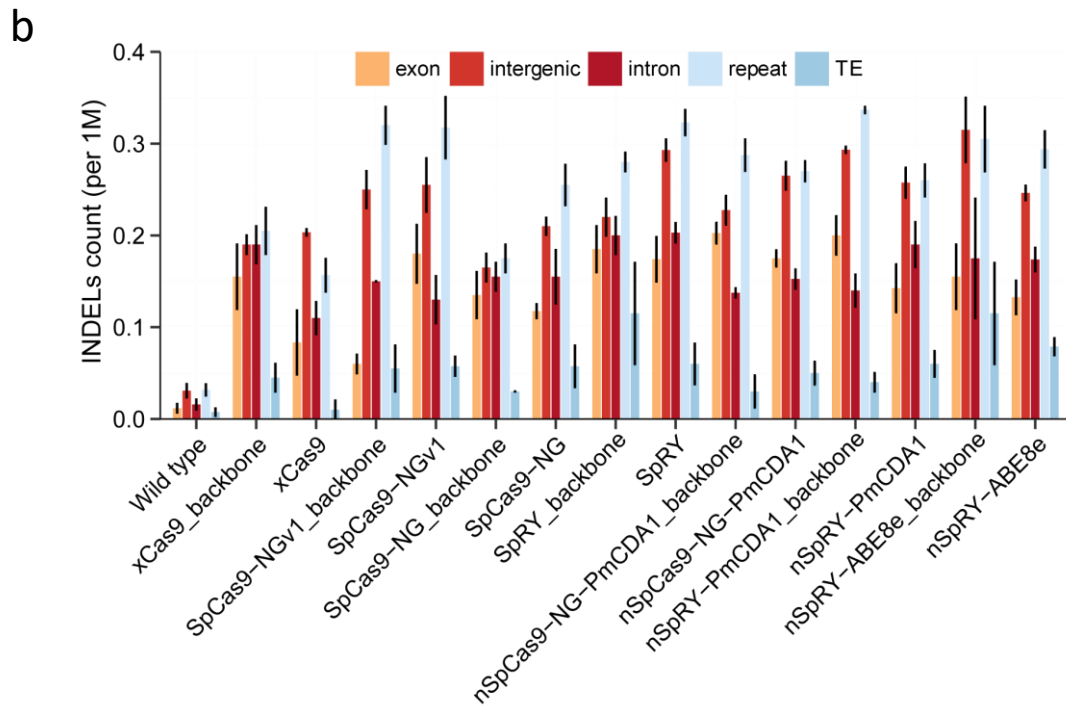

**Supplementary Fig 6. INDEL mutations in all sequenced samples and their genome-wide distributions. a,** Number of INDELs identified in all 58 sequenced samples. **b,** Average number of SNV mutations per 1 Mbp genomic region. Error bars represent s.e.m and the dots represent individual plants.

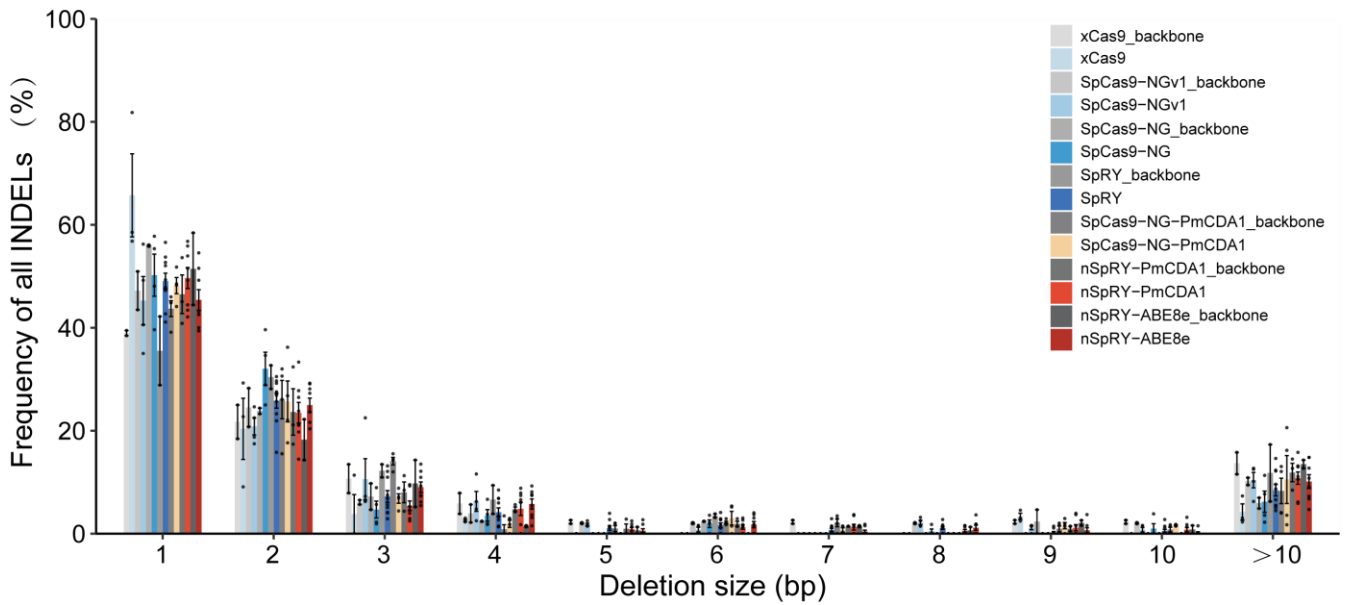

**Supplementary Fig 7. Comparison of deletion sizes among all mutations induced by different genome editing systems.** Error bars represent s.e.m and the dots represent individual  $T_0$  plants.

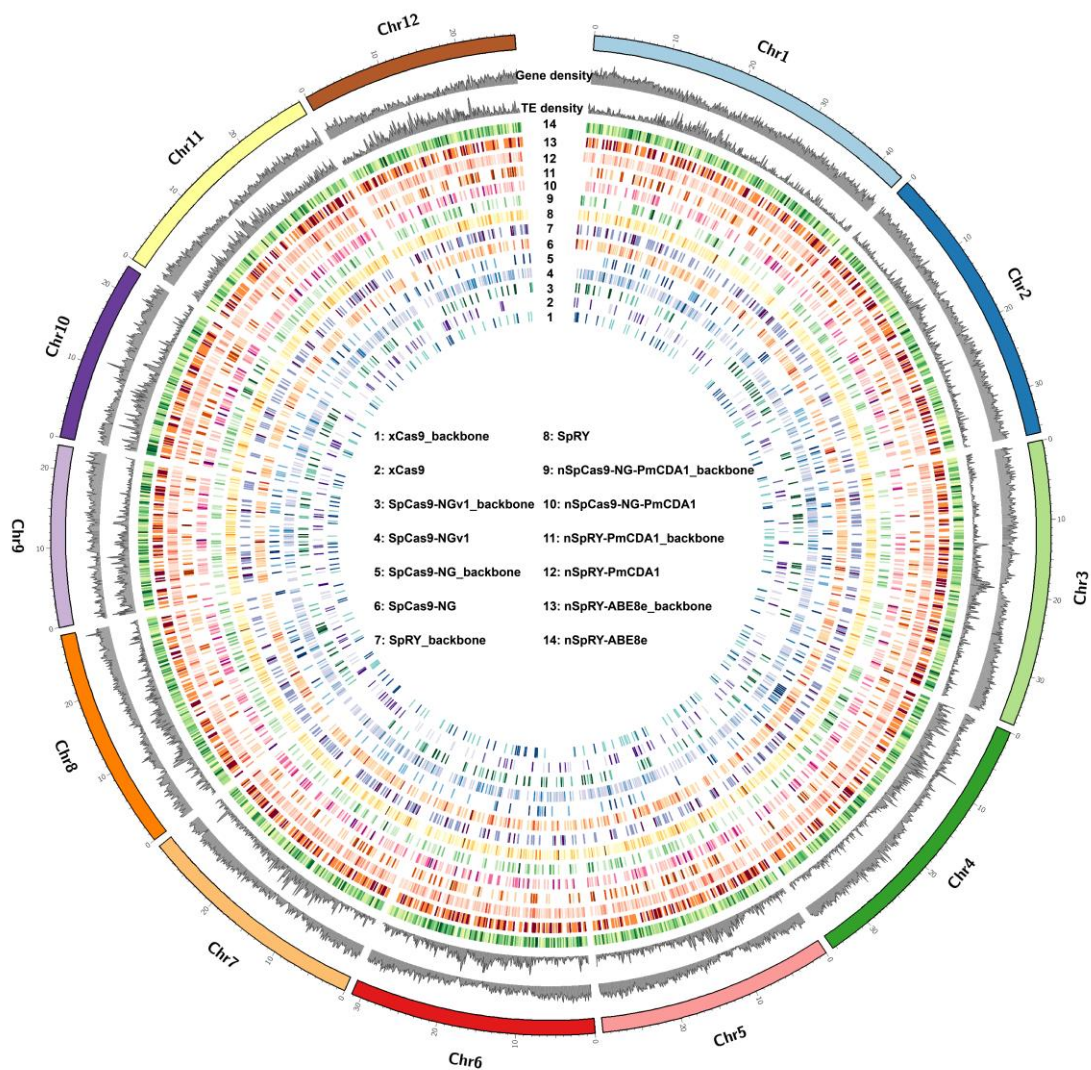

**Supplementary Fig 8. Genome-wide distribution of mutations (SNVs+INDELS) from all sequenced sample.**

nSpRY-ABE8e\_backbone A-to-G SNVs

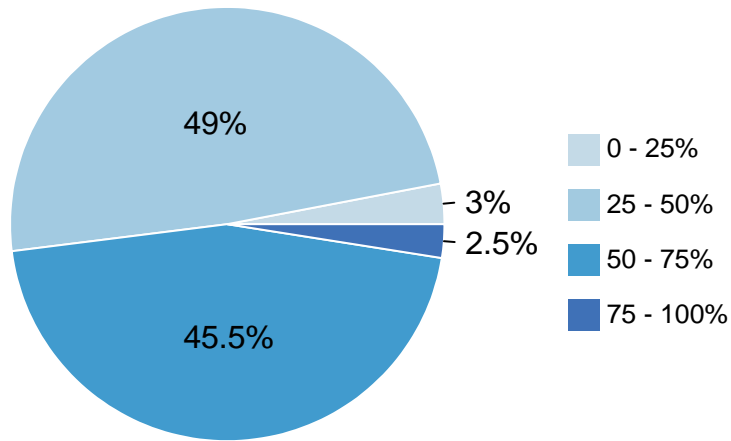

nSpRY-ABE8e A-to-G SNVs

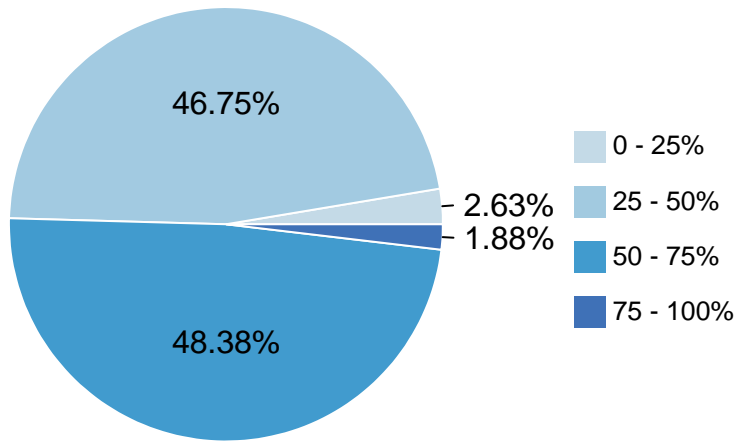

**Supplementary Fig 9. Allele frequencies of A-to-G SNVs identified in nSpRY-ABE8e ( $n=8$ ) and nSpRY-ABE8e\_backbone ( $n=2$ ) samples.**

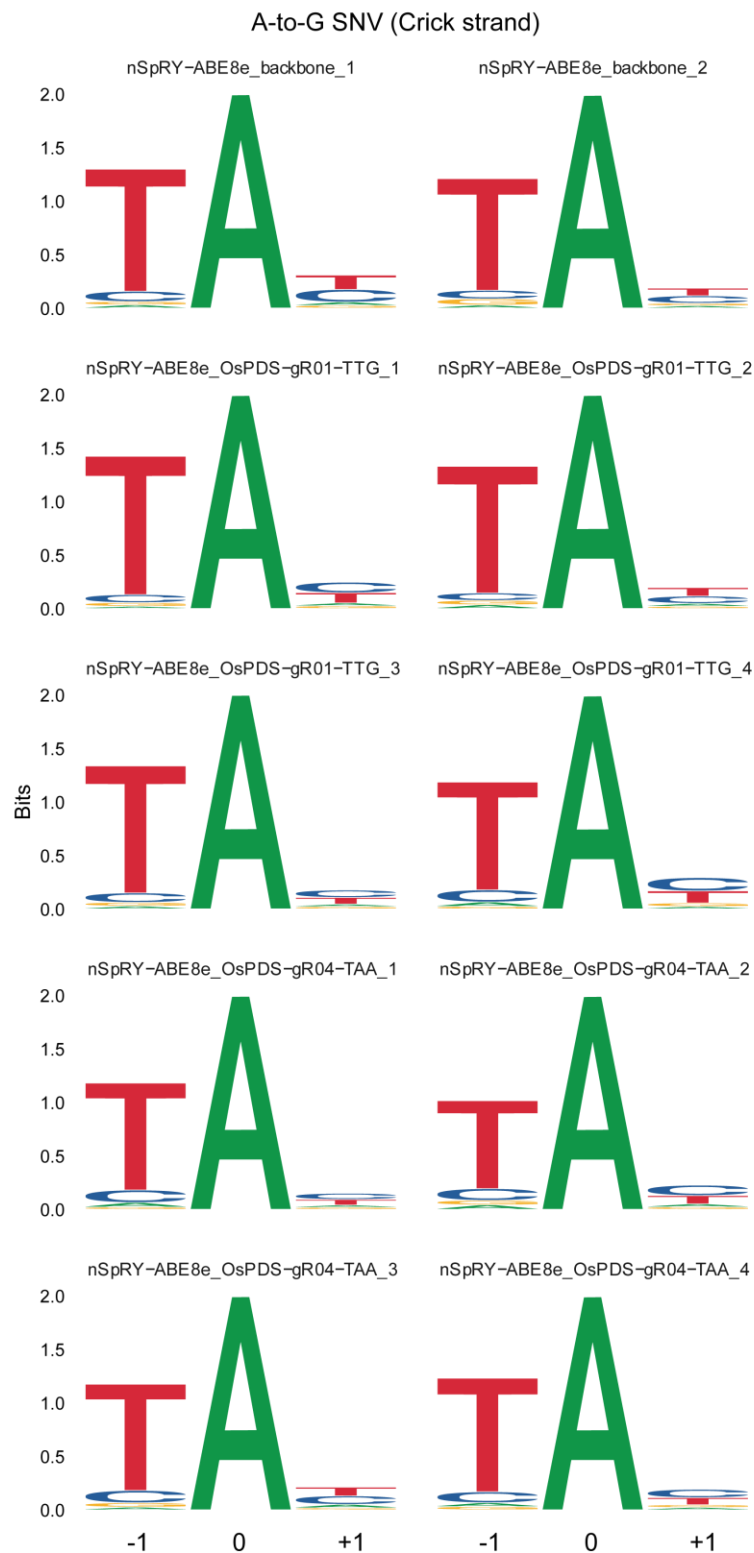

**Supplementary Fig 10. Sequence signature of ABE8e based genome-wide off-target mutations.** Preference of a TA motif by ABE8e at gRNA-independent off-target A-to-G base editing in Crick strand. The '0' indicates the A-to-G conversion position.

a

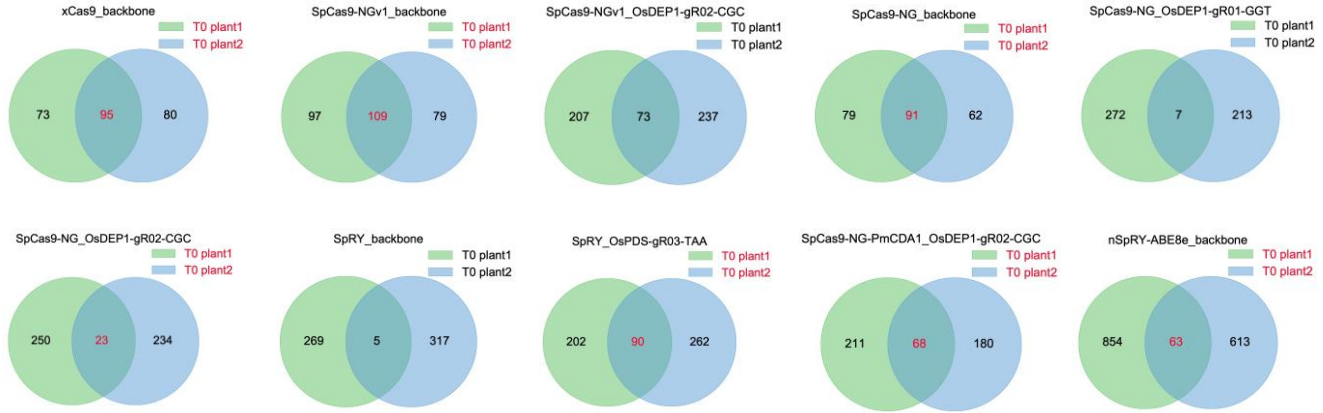

b

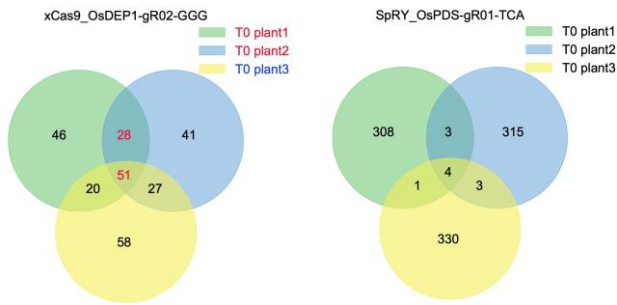

c

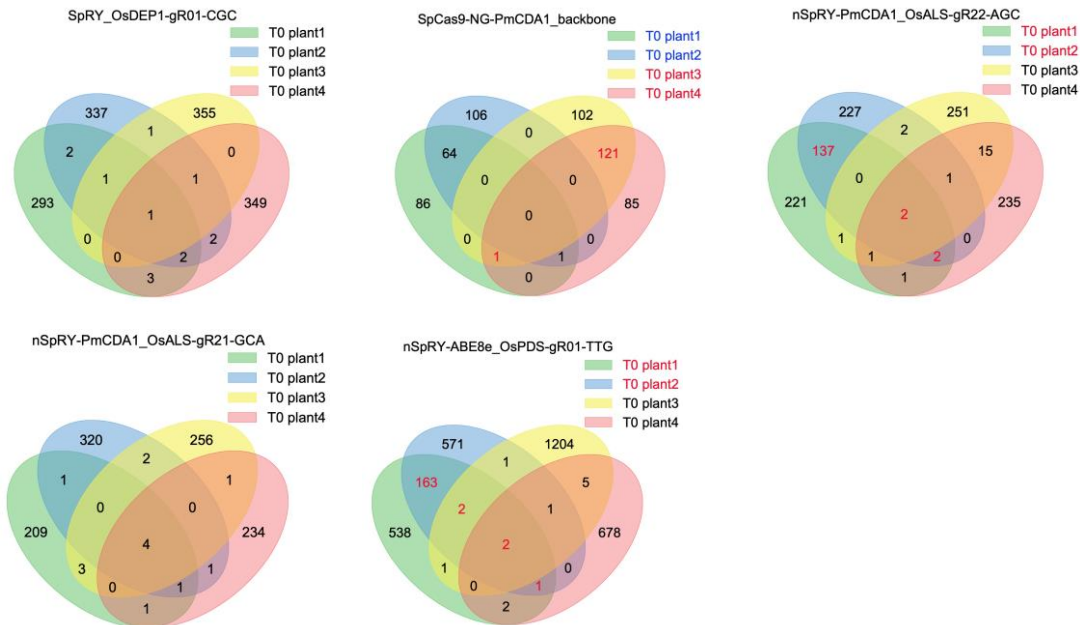

**Supplementary Fig 11. Venn diagram showing mutations shared between individual plants.** Each circle or oval represents an individual T<sub>0</sub> plant. Constructs that resulted in two T<sub>0</sub> lines (a), three T<sub>0</sub> lines (b), and four T<sub>0</sub> lines (c) were shown. The T<sub>0</sub> lines resulting from the same transgenic event are marked in red.
